1 **The MYO1B and MYO5B motor proteins and the SNX27 sorting nexin regulate**  
2 **membrane mucin MUC17 trafficking in enterocytes**

3

4 Sofia Jäverfelt<sup>1</sup>, Gustaf Hellsén<sup>1</sup>, Izumi Kaji<sup>2</sup>, James. R. Goldenring<sup>2</sup>, Thaher Pelaseyed<sup>1\*</sup>

5

6 1. Department of Medical Biochemistry and Cell Biology, Institute of Biomedicine, University  
7 of Gothenburg, Box 440, 405 30 Gothenburg, Sweden.

8

9 2. Department of Cell and Developmental Biology, Vanderbilt University, Nashville, TN  
10 37232, USA; Epithelial Biology Center, Vanderbilt University Medical Center; Section of  
11 Surgical Sciences, Vanderbilt University Medical Center, Nashville, TN 37232, USA;  
12 Nashville VA Medical Center, Nashville, TN 37232, USA.

13

14 \* Corresponding author: [thaher.pelaseyed@medkem.gu.se](mailto:thaher.pelaseyed@medkem.gu.se)

15

16 **Abstract**

17 A dense glycocalyx, composed of the megaDalton-sized membrane mucin MUC17, coats the  
18 microvilli in the apical brush border of transporting intestinal epithelial cells, called  
19 enterocytes. The establishment of the MUC17-based glycocalyx in the mouse small intestine  
20 occurs at the critical suckling-weaning transition. The enterocytic glycocalyx extends 1  $\mu$ m  
21 into the intestinal lumen and prevents the gut bacteria from directly attaching to the  
22 enterocytes. To date, the mechanism behind apical targeting of MUC17 to the brush border  
23 remains unknown. Here, we show that the actin-based motor proteins MYO1B and MYO5B,  
24 and the sorting nexin SNX27 regulate the intracellular trafficking of MUC17 in enterocytes.  
25 We demonstrate that MUC17 turnover at the brush border is slow and controlled by MYO1B  
26 and SNX27. Furthermore, we report that MYO1B regulates MUC17 protein levels in  
27 enterocytes, whereas MYO5B specifically governs MUC17 levels at the brush border.  
28 Together, our results extend our understanding of the intracellular trafficking of membrane  
29 mucins and provide mechanistic insights into how defective trafficking pathways render  
30 enterocytes sensitive to bacterial invasion.

31

## 32 **Introduction**

33 The epithelium of the small intestine consists of a tight single layer of highly polarized  
34 epithelial cells, covered by a permeable mucus layer [1, 2]. Luminal bacteria that breach the  
35 mucus layer encounter a second line of defense in a 1  $\mu\text{m}$  thick glycocalyx attached to the  
36 microvillus-studded apical brush border of transporting intestinal epithelial cells, called  
37 enterocytes [3]. Our previous studies identified membrane mucin MUC17 as a major  
38 component of the enterocytic glycocalyx [4], which forms a physical barrier that prevents  
39 direct bacterial contact with enterocytes [5]. MUC17 is 4493 amino acids long protein with an  
40 extracellular PTS-rich domain consisting of recurring proline, threonine, and serine residues  
41 organized in 60 tandem repeats [6]. The serine and threonine residues undergo O-linked  
42 glycosylation, resulting in an O-glycosylated mucin domain comprising 80% of the mucin's  
43 molecular weight [7]. The mucin domain connects to the transmembrane domain via an  
44 evolutionarily conserved sea urchin sperm protein, enterokinase and agrin (SEA) domain that  
45 is auto-catalytically cleaved during mucin biosynthesis and serves as a mechanosensor at  
46 the cell surface [8-10]. The cytoplasmic tail domain of MUC17 harbors a class I PSD95,  
47 DLG1, ZO-1 (PDZ)-binding motif (PBM) [6], which helps PDZ-containing protein 1, PDZK1 to  
48 retain MUC17 in the apical membrane. In addition, MUC17 holds two phosphorylation sites  
49 with undefined functions [11].

50 The MUC17-based glycocalyx is replenished every 12-24 hours [12], which is considerably  
51 faster than the turnover of individual enterocytes (3-5 days) [13-15]. As a result, enterocytes  
52 must carefully regulate the turnover of MUC17 to guarantee the barrier integrity of the  
53 glycocalyx. MUC17 turnover is slower in the ileum of germ-free mice compared to colonized  
54 mice, suggesting that the commensal gut microbiota plays a role in the renewal of the  
55 glycocalyx [16]. Recycling of membrane proteins in enterocytes is a tightly regulated process  
56 since it determines the composition of the apical and basolateral membranes, surface  
57 receptor activity, and ion transport. Membrane protein trafficking to and from the cell surface  
58 is mediated by myosin motor proteins and Rab GTPases, which coordinate the transport and  
59 retention of vesicle-borne membrane proteins within specific endosomal compartments [17].  
60 In addition, sorting nexins in early endosomes mediate rapid recycling of proteins back to the  
61 plasma membrane [18]. However, the intracellular trafficking pathway of MUC17 in  
62 enterocytes is entirely undefined.

63 Here, we combined quantitative proteomics, protein-protein interaction assays, CRISPR-  
64 Cas9-mediated gene deletion and imaging to demonstrate that the myosin motor proteins  
65 MYO1B and MYO5B regulate MUC17 targeting to the apical brush border. Moreover, we  
66 identified SNX27 as a novel MUC17 interaction partner.

67

## 68 **Results**

## 69 **A recombinant MUC17 exhibits correct processing and localization in Caco-2 cells**

70 To identify proteins required for MUC17 trafficking in enterocytes, we turned to the Caco-2  
71 colorectal adenocarcinoma cell line. Unpolarized Caco-2 cells differentiate over a period of  
72 21 days to form a polarized monolayer of columnar epithelial cells with a defined brush  
73 border membrane [19]. Importantly, Caco-2 cells express negligible levels of endogenous  
74 MUC17 [20, 21], allowing us to constitutively express a recombinant MUC17 with an  
75 endogenous signal sequence, an N-terminal 3xFlag tag and a mucin domain consisting of 7  
76 PTS-rich tandem repeats (Figure 1A). MUC17(7TR) localized to the tip of Ezrin- and F-actin-  
77 positive microvilli in differentiated Caco-2 cells (Figure 1B-C), thereby recapitulating the  
78 position of endogenous MUC17 in human and murine enterocytes [5]. Next, we asked  
79 whether Caco-2 cells correctly processed MUC17(7TR) by investigating the presence of  
80 mature N- and O-glycans (Figure 1D). Boiling prior to SDS-PAGE dissociates MUC17 into a  
81 large N- and a smaller C-terminal subunit that we can detect with fragment-specific  
82 antibodies (Figure 1A). The C-terminal subunit separated into two bands on SDS-PAGE; an  
83 upper band representing mature EndoH-resistant, PNGaseF-sensitive N-glycans and a lower  
84 band representing EndoH-sensitive, ER-resident protein species (Figure 1D, left panel). For  
85 O-glycan analysis, we took advantage of StcE, a bacterial metalloprotease with high  
86 specificity for O-glycosylated mucin domains [22]. We observed a diffuse 450-kDa band that  
87 was digested by StcE, thus representing the fully O-glycosylated N-terminal fragment of  
88 MUC17 (Figure 1D, right panel).

89 Brush border morphology and protein composition change during Caco-2 cell differentiation  
90 [23, 24], starting from sparsely spread individual microvilli that culminate in an organized  
91 array of tightly packed microvilli, marked by the emergence of an intermicrovillar adhesion  
92 complex (IMAC), including CDHR2 and CDHR5, at the tip of microvilli [24]. Since  
93 MUC17(7TR) localized to microvillus tips, we asked whether MUC17 localization is  
94 influenced by cell differentiation and microvillar packing. Assessment of the localization of  
95 MUC17 and CDHR5 during cell differentiation revealed robust apical MUC17 staining  
96 independent of cell differentiation stage, whereas CDHR5 appeared after 7 days of cell  
97 differentiation (Figure 1E-F). Transmission electron microscopy (TEM) on Caco-2 cells  
98 expressing MUC17(7TR) showed that microvillus length and packing, as well as density of  
99 the MUC17-based glycocalyx at microvillar tips increased at later stages of cell differentiation  
100 (Figure 1G-H). Hence, we concluded that MUC17(7TR) localizes apically to the brush border  
101 independent on the differentiation state of Caco-2 cells.

102

## 103 **The interactome of MUC17 uncovers mediators of intracellular trafficking**

104 To identify proteins that participate in trafficking of MUC17, we employed unbiased  
105 quantitative proteomics using stable isotope labeling in cell culture (SILAC) and reversible

106 crosslink immunoprecipitation (Re-CLIP) based on nonionic IGEPAL as detergent [25]  
107 (Figure 2A, Table S1). Addition of the reversible crosslinker DSP enabled us to capture  
108 transient protein interactions. Caco-2 (Light) and Caco-2-MUC17(7TR) (Heavy, C<sup>13</sup> Lys, C<sup>13</sup>  
109 Arg) cells at 21 dpc, with or without DSP crosslinking, were subjected to Flag-  
110 immunoprecipitation and proteomic analysis of the co-precipitated proteins. 35 and 38  
111 confident proteins were identified in the non-crosslinked and crosslinked samples,  
112 respectively (Figure 2B-C, Table S1). Out of these proteins, a minority were significantly  
113 enriched with MUC17(7TR) and included proteins involved in protein recycling (SNX27),  
114 processing (PPM1B, HSPA5, PSMD4, EEF1A1P5, AGR2) and transport (KIF11). PPM1B  
115 and AGR2 were only identified in cross-linked samples, whereas SNX27, PSMD4, and  
116 EEF1A1P5 were only present in non-crosslinked samples. HSPA5 and KIF11 were found in  
117 both conditions (Figure 2D). None of the identified proteins have been reported as MUC17  
118 interaction partners. Due to the small number of identified proteins, we developed a second  
119 Re-CLIP protocol based on the ionic detergent SDS to gain a deeper insight into the  
120 interactome of MUC17. Using this method, we identified 1058 confident protein hits of which  
121 19 proteins were specifically enriched for MUC17(7TR) (Figure 2E-F, Table S1). Amongst  
122 these, we found the myosin motor protein MYO1B, the F-actin bundling protein FSCN1, and  
123 proteins associated with the secretory pathway (CKAP4, DPYSL2, HM13, RTN4). Apart from  
124 the bait MUC17, we observed differences between the significantly enriched proteins  
125 captured by the two Re-CLIP protocols, suggesting that the two methods identify distinct  
126 MUC17 interaction profiles (Figure 2G).

127

### 128 **MYO1B and SNX27 localize with MUC17(7TR) to the brush border of enterocytes**

129 Based on our interactome discovery, we focused on MYO1B and SNX27. MYO1B regulates  
130 the apical targeting of membrane proteins to the brush border [26], whereas SNX27 is  
131 involved in the recycling of membrane proteins that interact with its N-terminal PDZ domain  
132 [27]. In Caco-2-MUC17(7TR) cells, endogenous MYO1B and SNX27 localized to the apical  
133 brush border, where they overlapped with MUC17(7TR) (Figure 3A). At higher magnification,  
134 MYO1B localized to the entire length of the microvilli and in the subapical terminal web  
135 region, whereas SNX27 localized to microvilli and to distinct puncta within the terminal web  
136 region (Figure 3B). Observations in differentiated Caco-2 cells were validated in mouse  
137 ileum, where both MYO1B and SNX27 localized to the brush border where Muc17 is  
138 positioned (Figure 3C). For additional validation, we defined the localization of recombinantly  
139 tagged rat Myo1b and human SNX27 co-expressed with MUC17(7TR) in differentiated Caco-  
140 2 cells (Figure 3D, Figure S1A). HA-Myo1b overlapped with MUC17(7TR) in the apical brush  
141 border, whereas SNX27 formed larger puncta below the brush border. MUC17 holds a  
142 conserved C-terminal class I PBM that can potentially mediate a PDZ interaction with SNX27

143 [6, 28]. Therefore, we introduced our tagged constructs into HEK293 cells (Figure S1A) and  
144 deployed co-immunoprecipitation assays to investigate whether Myo1b and SNX27 interact  
145 with MUC17(7TR). EGFP-SNX27 coprecipitated with MUC17(7TR) (Figure 3E) but, due to  
146 the poor expression of EGFP-SNX28 $\Delta$ PDZ, we were not able to demonstrate if the  
147 interaction was mediated by the PDZ domain of SNX27. In conclusion, we demonstrated that  
148 both MYO1B and SNX27 localize to the brush border together with MUC17. In addition, we  
149 detected a robust interaction between MUC17(7TR) and SNX27, while the MYO1B-  
150 MUC17(7TR) interaction was either indirect or too weak to capture without DSP crosslinking  
151 (Figure S1B)

152

### 153 **MYO5B regulates MUC17 trafficking to the plasma membrane**

154 Since we discovered the monomeric MYO1B in the interactome of MUC17, we asked  
155 whether other non-muscle myosins associate with MUC17. Mining of public single cell RNA-  
156 sequencing data sets revealed that MYO1A, MYO5B and MYO7B are highly enriched in  
157 enterocytes (Figure S2A). MYO5B is particularly interesting since it transports Rab8<sup>+</sup>Rab11<sup>+</sup>  
158 endosomes carrying membrane proteins to the apical brush border and regulates cell polarity  
159 [29, 30]. Moreover, loss-of-function mutations in MYO5B lead to Microvillus inclusion disease  
160 (MVID) in humans [31]. To determine the impact of MYO5B on MUC17 trafficking, we stained  
161 for Muc17 and Ezrin in ileal sections of *Myo5b<sup>fl/fl</sup>; Vil1-CreERT* mice injected with vehicle or  
162 tamoxifen to induce deletion of the *Myo5b* gene in *Vil1*-expressing intestinal epithelial cells.  
163 In *Myo5b<sup>fl/fl</sup>; Vil1-CreERT* mice injected with tamoxifen, Muc17 was completely absent from  
164 the brush border and restricted to large intracellular vesicles (Figure 4A-B). To further  
165 investigate how MYO5B regulates MUC17 transport, we deleted *MYO5B* in Caco-2-  
166 MUC17(7TR) cells (Figure S2B-C). While MUC17(7TR) resided in the apical brush border of  
167 WT cells, apical MUC17(7TR) was lost in *MYO5B<sup>-/-</sup>* cells, thereby reproducing the phenotype  
168 observed in *Myo5b <sup>$\Delta$ IEC</sup>* mice (Figure 4C-E). Moreover, *MYO5B<sup>-/-</sup>* cells demonstrated a  
169 dramatic reduction in microvillus-associated Ezrin.

170 Due to the dramatic shift in MUC17(7TR) localization observed in *MYO5B<sup>-/-</sup>* cells, we further  
171 investigated whether loss of MYO5B affects the surface pool of MUC17(7TR) by applying  
172 biotin surface labeling followed by streptavidin affinity purification (Figure 5A). *MYO5B<sup>-/-</sup>* cells  
173 presented less MUC17(7TR) on the apical surface compared to the WT control cells (Figure  
174 5B). Next, we took advantage of biotin proximity labelling by antibody recognition coupled to  
175 quantitative mass spectrometry to obtain a comparison of the intracellular context  
176 surrounding MUC17(7TR) in WT and *MYO5B<sup>-/-</sup>* cells (Figure 5C-E, Table S2). The proximal  
177 proteome of MUC17(7TR) in WT cells provided a unique insight into the protein environment  
178 that MUC17 encounters during intracellular trafficking to the brush border. The identified  
179 proteins participate in brush border and actin cytoskeleton remodeling (MYH14, PLS1,

180 EPS8L2, GSN) and intracellular vesicle trafficking machinery (ANX4, PACSIN3, APPL2,  
181 STX3) (Figure 5F, upper panel and 5G). STX3 is particularly interesting since it participates  
182 in membrane fusion of endosomes transported by MYO5B. In contrast to WT cells, the  
183 proximal proteome of MUC17(7TR) in *MYO5B*<sup>-/-</sup> cells was dominated by proteins associated  
184 with basolateral membranes, indicating a disruption of polarized transport of MUC17 to the  
185 apical brush border (Figure 5F, lower panel and 5G).

186

### 187 **MYO1B regulates MUC17 protein levels**

188 Based on the distinct apical and subapical localizations of MYO1B and SNX27, we  
189 hypothesized that the two proteins regulate the apical targeting of MUC17. For that reason,  
190 we deleted MYO1B and SNX27 separately in Caco-2 cells and re-introduced MUC17(7TR)  
191 (Figure S2B, S2D-E). Although MUC17(7TR) remained in the apical brush border in *MYO1B*<sup>-/-</sup>  
192 MUC17(7TR) cells (Figure 6A-B), total MUC17(7TR) protein levels were reduced upon loss  
193 of MYO1B (Figure 6C). Interestingly, WT MUC17(7TR) cells and *MYO5B*<sup>-/-</sup> cells displayed  
194 fewer microvillar clusters compared to WT and *MYO1B*<sup>-/-</sup> cells (Figure 6D). A higher  
195 magnification of *MYO1B*<sup>-/-</sup> cells showed that MUC17(7TR) was no longer restricted to the  
196 microvilli but also appeared in the terminal web (Figure 6E). Together, our findings  
197 demonstrated that deletion of MYO1B resulted in decreased total MUC17 protein levels but  
198 did not impact the overall localization of MUC17 in the apical brush border of Caco-2 cells.

199

### 200 **Reduced apical MUC17 targeting in MYO1B-deficient cells**

201 While loss of MYO5B had a dramatic negative effect on the targeting MUC17 to the apical  
202 brush border, MYO1B and SNX27 had modest effects on MUC17 localization in fixed  
203 differentiated Caco-2 cell. Therefore, we asked whether MYO1B and SNX27 influence the  
204 kinetics of MUC17 at the apical brush border in live cells. To address this question, we took  
205 advantage of Fluorescence recovery after photobleaching (FRAP). To specifically tag  
206 surface-attached MUC17(7TR) with a fluorescent label, we coupled a fluorescent dye to the  
207 inactive E447D mutant of StcE that only binds mucins. First, we showed that StcE E447D  
208 bound and enriched for the mature and fully glycosylated form of MUC17(7TR) with a  
209 molecular weight of around 450 kDa in WT cells (Figure 7A-B, Figure S3). StcE E447D also  
210 captured mature MUC17(7TR) in *MYO5B*<sup>-/-</sup> and *SNX27*<sup>-/-</sup> cells, and to a lower extent in  
211 *MYO1B*<sup>-/-</sup> since total MUC17(7TR) protein levels are lower in this line (Figure 6C). Thus, we  
212 concluded that the difference in MUC17 protein levels and localization in KO cells was not a  
213 result of altered MUC17(7TR) processing. Next, we used imaging to investigate if  
214 fluorescently labelled StcE E447D specifically detects surface-bound MUC17(7TR) in Caco-2  
215 monolayers (Figure 7C). Strikingly, while the staining with StcE E447D in WT Caco-2  
216 appeared to be mainly intracellular, there was a strong correlation between MUC17(7TR)

217 and StcE E447D in the apical brush border of MUC17(7TR) cells (Figure 7C-E). In  
218 MUC17(7TR) cells lacking MYO1B, MYO5B or SNX27, there was less overlap between  
219 MUC17(7TR) and StcE E447D (Figure 7E). After demonstrating that StcE E447D specifically  
220 binds MUC17(7TR), we used FRAP to measure the kinetics of MUC17 at the apical brush  
221 border in live WT and KO cells (Figure 7F). Fluorescent recovery of MUC17(7TR) in WT cells  
222 was slow ( $t_{1/2}$ =6 min) and incomplete at the end point of the experiment (12 minutes) (Figure  
223 7F and 7G, left panel). In addition, we estimated the mobile fraction representing the lateral  
224 diffusion of MUC17(7TR) within the plasma membrane to 45% (Figure 7G, right panel).  
225 Compared to WT cells, the recovery of MUC17(7TR) was significantly slower in *MYO1B*<sup>-/-</sup>  
226 cells ( $t_{1/2}$ =10 min), while MUC17(7TR) recovered faster in *SNX27*<sup>-/-</sup> cells. Moreover, the  
227 mobile fraction of MUC17(7TR) decreased by 50% in *SNX27*<sup>-/-</sup> cells. No difference in  
228 turnover was observed in MUC17(7TR) *MYO5B*<sup>-/-</sup> cells. Together, our results indicate that  
229 MUC17 trafficking and targeting to the plasma membrane is a slow process under baseline  
230 conditions with limited diffusion at the brush border. Furthermore, MYO1B regulates apical  
231 targeting of MUC17, whereas SNX27 affects the dynamic behavior of MUC17 at the plasma  
232 membrane.

233

## 234 Discussion

235 We have previously identified a MUC17-based glycocalyx covering the surface of  
236 enterocytes. Importantly, the absence of the enterocytic glycocalyx results in increased  
237 bacterial contact with the enterocytic brush border [5]. Our findings highlight the importance  
238 of a precise regulation of MUC17 trafficking in enterocytes. In this study, we mapped the  
239 trafficking machinery of MUC17 in the epithelial cell line Caco-2. Confluent Caco-2 cells  
240 undergo a differentiation process, mirroring the *in vivo* maturation of enterocytes along the  
241 crypt-villus axis. Differentiated Caco-2 cells are characterized by a less pronounced  
242 tumorigenic phenotype, cytoskeletal rearrangements [23] and tightly packed microvilli held  
243 together by tip links formed by an IMAC [24]. Our investigation showed that MUC17 is  
244 expressed on the apical membrane regardless of the cell differentiation whereas the MUC17-  
245 based glycocalyx becomes denser as microvillus packing takes place late during cell  
246 differentiation. These findings are consistent with the localization of MUC17 in differentiated  
247 villus enterocytes as well as less differentiated crypt cells in human and mouse ileum [5].  
248 These sequences of events suggest that MUC17 is inserted in the apical membrane prior to  
249 microvillus assembly. As the enterocyte reaches a differentiated state marked by a brush  
250 border, tight packaging of microvilli places MUC17 at the distal tip of individual protrusions,  
251 where a dense glycocalyx is established.

252 PDZ proteins regulate membrane mucin trafficking through the Golgi apparatus and retention  
253 at the apical cell membrane [6, 32] but we lack a comprehensive understanding of how large



254 membrane mucins such as MUC17 are transported within enterocytes. Here, we developed  
255 two enrichment protocols that both identified primarily cytoplasmic proteins involved in  
256 protein recycling, processing, and transport. PDZ-domain containing SNX27 directs  
257 endocytosed proteins from the early endosomes to the plasma membrane [33]. We showed  
258 that MUC17 binds SNX27 and that both proteins localize to the apical brush border of  
259 enterocytes, but we could not confirm that the interaction was PDZ-dependent. We also  
260 showed that SNX27 impacts the slow kinetics of MUC17 at the apical brush border. In  
261 *SNX27<sup>-/-</sup>* cells, a higher proportion of MUC17 remained static within the brush border, while  
262 the remaining mobile fraction diffused more rapidly. Our data indicate that enterocytes  
263 maintain glycocalyx barrier integrity by stabilizing the apical pool of MUC17 in the absence of  
264 SNX27-mediated recycling of membrane mucins to the plasma membrane.

265 The role of the unconventional non-muscle myosins in microvillar assembly and function has  
266 been extensively characterized [34]. Our mapping of the MUC17 interactome identified the  
267 monomeric myosin MYO1B, which regulates the targeting of amino acid transporters to the  
268 brush border of kidney cells [26]. MYO1B interacts with actin filaments but lacks the capacity  
269 to transport vesicular cargo along filaments [35, 36]. Actin-bound MYO1B induces tubule  
270 formation in endosomal and lysosomal membranes, as well as the trans-Golgi network,  
271 thereby controlling proteins trafficking between endocytic compartments [37, 38]. Both  
272 endogenous and recombinant MYO1B localized with MUC17 in the brush border of cultured  
273 cells and mouse ileum. Depletion of MYO1B resulted in reduced total MUC17 protein levels  
274 and slower MUC17 turnover in the brush border. The latter phenotype could be explained by  
275 a higher abundance of microvillar clusters that restrict MUC17 diffusion in the brush border  
276 membrane of *MYO1B<sup>-/-</sup>* cells. We also addressed the role of the dimeric unconventional  
277 myosin MYO5B in MUC17 trafficking. Apical transporters such as NHE3, AQP7, and SGLT1  
278 depend on MYO5B for their targeting to the brush border [39] and mutations in the *MYO5B*  
279 gene have been linked to the congenital diarrheal disorder MVID caused by the  
280 mislocalization of membrane transporters that maintain cell and fluid homeostasis [40].  
281 MUC17 was removed from the enterocytic brush border in the ileum of *Myo5b<sup>ΔIEC</sup>* mice and  
282 in *MYO5B<sup>-/-</sup>* Caco-2 monolayers. Moreover, biotin proximity labelling in *MYO5B<sup>-/-</sup>* cells  
283 revealed that the recycling defects associated with MYO5B deletion resulted in incorrect  
284 targeting of MUC17 to the basolateral membrane domain. Our findings are in line with the  
285 role of MYO5B in regulating apical cell polarity [41].

286 In conclusion, we show that MYO1B, MYO5B and SNX27 regulate the intracellular trafficking  
287 of the glycocalyx-forming membrane mucin MUC17 in enterocytes. Unravelling the cellular  
288 mechanisms that govern the formation of the glycocalyx barrier sheds light on fundamental  
289 cellular processes for combatting bacterial encroachment on the intestinal epithelium.

290 Importantly, our insights into MUC17 trafficking pathways could prove critical for identifying  
 291 molecular defects that render enterocytes sensitive to bacterial invasion.

292

293 **Material and Methods**

294 **Antibodies and fluorescent probes**

| Antibody                             | Source                              | Method                  | Working dilution         |
|--------------------------------------|-------------------------------------|-------------------------|--------------------------|
| anti-Actin                           | MAB1501, Sigma-Aldrich              | IB                      | 1:5000                   |
| anti-CDHR5                           | HPA009081, Sigma-Aldrich            | ICC/IHC                 | 1:250                    |
| anti-Ezrin                           | E8897, Sigma-Aldrich                | ICC/IHC                 | 1:500                    |
| anti-Ezrin                           | HPA021616, Atlas Antibodies         | ICC/IHC                 | 1:100                    |
| anti-Flag                            | F1804, Sigma-Aldrich                | ICC/IHC<br>IB<br>In-gel | 1:500<br>1:2000<br>1:500 |
| anti-GFP                             | G6539, Sigma-Aldrich                | IB                      | 1:1000                   |
| anti-HA                              | H3663, Sigma-Aldrich                | ICC/IHC<br>IB           | 1:500<br>1:2000          |
| anti-MYO1B                           | HPA060144, Atlas antibodies         | ICC/IHC<br>IB           | 1:32<br>1:1000           |
| anti-SNX27                           | ab77799, Abcam                      | ICC/IHC<br>IB           | 1:100<br>1:1000          |
| anti-MUC17-C1                        | (REF)                               | IB                      | 1:3000                   |
| anti-MUC17-S1                        | (REF)                               | IB                      | 1:250                    |
| anti-MYO5B                           | HPA040902, Atlas antibodies         | IB                      | 1:350                    |
| Alexa Fluor-488 donkey<br>anti-mouse | A2102, Thermo Fisher<br>Scientific  | ICC/IHC                 | 1:300                    |
| Alexa Fluor-555 donkey<br>anti-mouse | A31572, Thermo Fisher<br>Scientific | ICC/IHC                 | 1:300                    |
| Alexa Fluor-488 goat<br>anti-rabbit  | A11055, Thermo Fisher<br>Scientific | ICC/IHC                 | 1:300                    |
| Alexa Fluor-555 goat<br>anti-rabbit  | A21434, Thermo Fisher<br>Scientific | ICC/IHC                 | 1:300                    |
| Alexa Fluor-647<br>Phalloidin        | A22267, Thermo Fisher<br>Scientific | ICC/IHC                 | 1:150                    |
| Donkey anti-mouse<br>Alexa Fluor 680 | A10038, Thermo Fisher<br>Scientific | IB<br>In-gel            | 1:20000<br>1:10000       |
| Goat anti-rabbit Alexa               | A11369, Thermo Fisher               | IB                      | 1:20000                  |

|               |                                  |         |         |
|---------------|----------------------------------|---------|---------|
| Fluor 790     | Scientific                       | In-gel  | 1:10000 |
| Hoechst 34580 | H21486, Thermo Fisher Scientific | ICC/IHC | 1:10000 |

295

## 296 **Plasmids**

297 cDNA encoding recombinant MUC17(7TR) with N-terminal 3xFlag tag was generated using  
298 Gibson Assembly (E2611S, NEB) following the manufactures protocol. A cDNA insert with  
299 the endogenous MUC17 signal sequence fused to 3xFlag followed by sequence-optimized  
300 last 7 N-terminal tandem repeats of the mucin was prepared (see Supplementary figure S4).  
301 The insert was equipped with 5' and 3' flanking sequences overlapping with the pXL-CAG-  
302 Zeocin-3xF2A plasmid [42] digested with NotI and Ascl restriction enzymes. Rat Myo1b  
303 (Plasmid #135064, Addgene) C-terminal Myc-tag, and SNX27 and SNX27 $\Delta$ PDZ (a kind gift  
304 by Prof. Peter J. Cullen [28, 33]) with N-terminal EGF-tag were cloned into the pXL-CAG-  
305 Zeocin-3xF2A. The following guide RNAs were used for the deletion of *MYO1B*, *MYO5B* and  
306 *SNX27* genes using the pLentiCRISPR v2 vector according to the protocol by the Zhang lab  
307 [43, 44] *MYO1B* 5'-ATGAAGGTCTCCTCATTGAG-3', *MYO5B* 5'-  
308 GCGCTCAGCTGAGTTAACCA-3', and *SNX27* 5'- GCTACGGCTTCAACGTGCG-3'. Vectors  
309 containing gRNAs were transformed into One Shot™ Stbl3™ Chemically Competent E. coli  
310 according to manufacturer's protocol (Invitrogen) and confirmed by sequencing using primer  
311 U6-F GAGGGCCTATTTCCCATGATT.

312

## 313 **Immunohistological sections from human and mouse ileum**

314 Human biopsies were sampled from ileum of individuals without suspected Inflammatory  
315 Bowel Disease, who were referred to Sahlgrenska University Hospital (Gothenburg, Sweden)  
316 for ileocolonoscopy, and subject to the provision of written informed consent (ethical permit  
317 2020-03196). Wild-type C57BL/6N mice were maintained under standardized conditions of  
318 temperature (21–22°C) and illumination (12-hour light/dark cycle) with food and water ad  
319 libitum. The Swedish Laboratory Animal Ethical Committee in Gothenburg approved the  
320 experiments conducted in this study (ethical permit 2285-19). The care and use of animals  
321 were performed in accordance with the Swedish animal welfare legislation, which meets the  
322 European Convention for the Protection of Vertebrate Animals used for Experimental and  
323 other Scientific Purposes (Council of Europe N° 123, Strasbourg 1985) and the European  
324 Union Directive 2010/63/EU on the protection of animals used for scientific purposes.  
325 Animals were anesthetized with isoflurane followed by cervical dislocation. Animals of 6-8  
326 weeks of age and of both genders were used. Weaning occurred on day 21 after birth (P21).  
327 For investigation of Myo5b function in mouse ileum, Cre recombinase was activated in 8- to  
328 10-week-old *VillinCreErt2;Myo5b<sup>fl/fl</sup>* by one intraperitoneal injection of tamoxifen (2 mg).

329 Tamoxifen-injected *Myo5b<sup>fl/fl</sup>* mice and *VillinCreErt2;Myo5b<sup>fl/+l</sup>* mice were used as controls  
330 [29]. All *VillinCreErt2;Myo5b<sup>fl/fl</sup>* and control mice were killed 4 days after the tamoxifen dose.  
331 The care, maintenance, and treatment of *VillinCreErt2;Myo5b<sup>fl/fl</sup>* mice followed protocols  
332 approved by the Institutional Animal Care and Use Committee of Vanderbilt University.

333

### 334 **Cell culture, transfections and Crispr/Cas9-mediated gene deletion**

335 Caco-2 (ATCC HT-37) and HEK293T (ATCC CRL-1573) cells were cultured in Iscove's  
336 modified Dulbecco's medium (IMDM, Invitrogen Life Technologies, Carlsbad CA) containing  
337 10% (vol/vol) FBS at 37°C in 5% CO<sub>2</sub>. Caco-2 cells for SILAC (#A33969, #88210 Thermo  
338 Fisher Scientific) were cultured in Dulbecco's modified Eagle medium supplemented with  
339 <sup>13</sup>C<sub>6</sub> L-lysine and <sup>13</sup>C<sub>6</sub>L-Arginine (heavy medium) or <sup>12</sup>C<sub>6</sub>L-Lysine and <sup>12</sup>C<sub>6</sub>L-Arginine (light  
340 medium) respectively for 5 passages to ensure complete incorporation (>95%). Transfections  
341 to generate stable clones were performed with 50% and 80% confluent Caco-2 and  
342 HEK293T cells, respectively, seeded in 9.6 mm<sup>2</sup> wells. All transfections to introduce  
343 recombinant constructs were performed using Lipofectamine® 2000 to introduce the  
344 PiggyBac transposon system with a transposase (pCAG-mPB-orf):transposon (pXL-BacII-  
345 CAG-Zeocin-triple-F2A) ratio of 1:2.5. Transfected cells were incubated with a total of 4 µg  
346 DNA and 10 µL Lipofectamine 2000 (11668019, Thermo Fisher Scientific) complex for 72  
347 hours and selected for another 14 days with 300µg/mL Zeocin. For CRISPR/Cas9-  
348 transfections, cells were selected for 3 days with 700 µg/mL G418, and individual colonies  
349 picked for expansion and screening by immunoblotting.

350

### 351 **Co-immunoprecipitation**

#### 352 ***Method 1 with nonionic IGEPAL detergent***

353 3 x 10<sup>5</sup> of MUC17(7TR) Caco-2 (Heavy) and WT Caco-2 (Light) cells were seeded into 9.6  
354 mm<sup>2</sup> wells and used for pull-downs experiments at 14 DPC. Re-CLIP was performed by  
355 rinsing the cells three times with 37°C PBS followed by incubating cells with 1.25 mM DSP  
356 for 2 min at 37°C. DSP was quenched at RT with 3 washes of TBS. Non-crosslinked cells  
357 were washed three times in TBS at RT. Cells were subjected to Flag-immunoprecipitations  
358 as previously described [45]. Briefly, cells were washed 3x5 min in 37 °C PBS, lysed in 1.5  
359 µL ice-cold Lysis buffer 1 (0.5 % IGEPAL, 250 mM NaCl, 50 mM Tris/HCl pH 7.4, 1 mM  
360 EDTA, 1X cOmplete EDTA-free protease inhibitor cocktail (11697498001, Roche), 1mM  
361 PMSF, 15 µL phosphatase inhibitor cocktail 2 (P5726, Sigma-Aldrich) and 3 (P0044, Sigma-  
362 Aldrich)), and incubated at 4°C for 20 min on an orbital shaker. Cells were collected by  
363 scraping and sonicated for 3 min in a water-bath sonicator with ice at 10°C. The cell lysate  
364 was cleared by centrifugation at maximum speed for 30 min at 4°C and 50 µL of the  
365 supernatant was saved as input. 50 µL of EZview™ Red ANTI-FLAG® M2 affinity gel

366 (F2426, Sigma-Aldrich), equilibrated in Lysis buffer 1, was added to the sample that were  
367 incubated overnight at 4°C on rotation. Beads were washed three times in Lysis buffer 1 and  
368 three times in Lysis buffer 1 without IGEPAL at 4°C. Enriched proteins were eluted by adding  
369 25 µL 3xFLAG peptide (4 µg/µL) for 30 min at 4°C. Eluted proteins were separated from  
370 beads with Corning Costar Spin-X filter units (#CLS8162, Sigma-Aldrich) and stored at -20°C  
371 until further processing.

372

### 373 **Method 2 with ionic SDS detergent**

374 Cells were crosslinked with 1.25 mM DSP for 2 min at 37 °C followed by three washes in  
375 TBS. Cells were lysed in 500 µL Lysis buffer 2 (1% SDS, 250 mM NaCl, 50 mM Tris/HCl pH  
376 7.4, 1mM EDTA, 1x cOmplete EDTA-free protease inhibitor cocktail, 1mM PMSF, 3 µM Beta-  
377 Glycerol phosphate, 15 µL phosphatase inhibitor cocktail 2 and 3). Cell lysates were  
378 sonicated for 10 seconds and centrifuged at maximum speed for 30 min at 4°C.  
379 Supernatants from heavy and light samples were mixed at a 1:1 ratio and diluted 1:10 to  
380 reach 0.1% SDS final concentration. 50 µL EZview™ Red ANTI-FLAG® M2 affinity gel was  
381 added to each sample and incubated overnight at 4°C on rotation. Beads were washed three  
382 times in TBS+0.1% SDS and eluted by the addition of 50 µL elution buffer (1% SDS, 100 mM  
383 Tris pH 8.0, 100mM DTT) and boiling at 95°C for 5 min. Eluted proteins were separated from  
384 beads with Costar Spin-X filter units (8160, Corning) and stored at -20°C until further  
385 processing.

386

### 387 **Co-immunoprecipitations in HEK293 cells**

388  $6 \times 10^5$  HEK293T cells stably expressing recombinant constructs were seeded in 9.6 mm<sup>2</sup>  
389 wells and used for pull-down experiments. Co-immunoprecipitations were performed in the  
390 absence of DSP according to method 1 with the additional step of blocking the EZview™  
391 Red ANTI-FLAG® M2 affinity gel with 5% BSA in TBS for 2 hours at 4°C on rotation and  
392 washed 2 times in Lysis buffer 1 without IGEPAL before performing immunoprecipitation.

393

### 394 **Cell surface biotinylation**

395  $3 \times 10^5$  Caco-2 cells were seeded on 9.6 mm<sup>2</sup> wells and let to differentiate for 14 days post-  
396 confluency (DPC). To label the surface proteins, cells were washed three times with ice-cold  
397 PBS and incubated with 0.25 µg/mL biotin hydrazide (66640-86-6, Sigma-Aldrich) in cold  
398 PBS for 1 hour on ice. After biotin labeling, cells were washed three times with TBS (pH 7.4)  
399 and left in the last TBS wash for 20 min at RT. Cells were lysed in 1 mL Lysis Buffer (1%  
400 Triton-X, 25 mM Tris/HCl pH 7.4, 150 mM NaCl, 1 mM EDTA, 4% glycerol supplemented  
401 with 1X cOmplete EDTA-free protease inhibitor cocktail) for 10 min on ice. Lysates were  
402 homogenized by sonication and centrifuged at 16,000 g for 30 min at 4°C. 50 µL of cell lysate

403 was mixed with reducing sample buffer and used as input loading control. 30  $\mu$ L EZview™  
404 Red Streptavidin Affinity Gel (E5529, Sigma-Aldrich) was added to each supernatant and  
405 incubated on rotation for 2 hours at 4°C. After three washes with Lysis buffer, the bound  
406 material was eluted with reducing sample buffer and boiled at 95°C for 5 min. Samples were  
407 separated on a 4–15% gel by SDS-PAGE and transferred to PVDF-FL membranes  
408 (IPFL00010, Merck). Membranes were blocked with 5% non-fat milk in PBS and incubated  
409 with primary antibodies diluted in 5% non-fat milk in PBS+0.1%Tween-20 (PBS-T) O/N at  
410 4°C. After 3 PBS-T washes, protein bands were visualized with Odyssey CLx imaging  
411 system (LI-COR Biosciences). Total biotinylated proteins in samples were detected with  
412 Alexa Fluor™ 790 Streptavidin Conjugate (1:20 000, S11378, Thermo Fisher Scientific).  
413 Band densities were quantified using Image Studio quantification software (LI-COR  
414 Biosciences).

415

#### 416 **Expression and labelling of StcE and StcE E447D**

417 Tuner (DE3) competent cells (70623, Sigma-Aldrich) were transformed with pET28b-StcE-  
418  $\Delta$ 35-NHis or pET28b-StcE-E447D- $\Delta$ 35-NHis (kind gift from Prof. Carolyn Bertozzi [46]) and  
419 grown on LB Agar with kanamycin at 37 °C overnight. A single colony was pre-cultured in 10  
420 mL LB kanamycin overnight, and the preculture expanded in 1 L LB kanamycin until an  
421 optical density of 0.85 was reached. Protein production was induced with 0.2 mM IPTG at  
422 30°C overnight. Bacterial cells were centrifuged at 3500 x g for 20 min at 4°C, resuspended  
423 in 20 mL of ice-cold PBS, and centrifuged at 3500 x g for 20 min at 4°C. Cell pellets were  
424 resuspended in 20 mL of ice-cold Binding Buffer (20 mM sodium phosphate, 300 mM NaCl,  
425 20 mM Imidazole, pH 7.4.) containing 2.5X Roche Complete EDTA-free protease inhibitor  
426 cocktail (11873580001, Sigma-Aldrich). The bacterial slurry was sonicated for 8 x 30  
427 seconds at 50% duty in a water bath maintained at 4°C. Lysates were centrifuged at 22,000  
428 x g at 4°C for 20 minutes and poured over 4 mL of HisPur Cobolt resin (89964, Thermo  
429 Fisher Scientific). The slurry was rotated at 4°C for 1 hour and spun down at 700 x g for 2  
430 minutes. The resin was washed three times with Binding Buffer including protease inhibitor  
431 cocktail, and bound protein eluted at 4°C with three subsequent 15-minute elutions using 3  
432 mL of Elution Buffer (20 mM sodium phosphate, 300 mM NaCl, 500 mM Imidazole, pH 7.4).  
433 Elution fractions were pooled and dialyzed against 5 L PBS at 4°C overnight, followed by a  
434 second round of dialysis in 5 L PBS for 4 hr at 4°C.

435 For enrichment of MUC17(7TR) using StcE E447D, StcE E447D was coupled to CNBr-  
436 Activated Sepharose 4B (17043001, Cytiva). 1 gram of CNBr-Activated Sepharose 4B was  
437 resuspend in 10 mL of 1 mM HCl for 1 hour, centrifuged at 1000 x g for 5 min at RT and  
438 washed for 15 minutes with 10 mL of 1 mM HCl followed by centrifugation. Swelled agarose  
439 was washed with 2 x 10 mL Coupling Buffer (100 mM NaHCO<sub>3</sub>, 500 mM NaCl, pH 8.3) and

440 centrifuged between each wash. 10 mg of StcE E447D was diluted with Coupling Buffer to a  
441 final volume of 10 mL, added to the swelled CnBr agarose and rotated overnight at 4°C. The  
442 CnBr agarose was washed with 2x 10 mL Coupling Buffer and quenched with 10 mL ice-cold  
443 250 mM Glycine on overnight rotation at 4°C. The CnBr agarose was washed 5 times with 10  
444 mL Coupling Buffer and resuspended in 10 mL H buffer (150 mM NaCl, 50 mM Tris pH 7.4 +  
445 0.02% NaN<sub>3</sub>). The volume was adjusted to a 50% slurry. 50-100 µl of 50% StcE-CnBr slurry  
446 was used for each pull-down.

447

#### 448 **EndoH, PNGaseF and StcE treatments**

449 3 x10<sup>5</sup> Caco-2 cells were seeded in 9.6 mm<sup>2</sup> dishes and differentiated for 14 DPC. Cells  
450 washed 3 x 5 min with PBS (RT) and lysed with 200 µL ice cold Lysis buffer (25 mM Tris-  
451 HCL pH 7.4, 150 mM NaCl, 4% glycerol, 1% Triton X-100) complemented with final  
452 concentration of 1X EDTA-free Complete protease inhibitor cocktail (34044100, Roche) and  
453 1 mM PMSF (78830, SigmaAldrich). Cells were incubated with Lysis buffer for 10 min on ice,  
454 collected by scraping and homogenized by sonication in water bath at 40% amplitude for 30  
455 sec pulses for 4 min. Cell lysates were cleared by centrifugation at 16,000 x g for 30 min at  
456 4°C. For EndoH and PNGaseF treatments, 30 µL cell lysates were mixed with 10µL 200 mM  
457 DTT, 1 µL PMSF, 2 µL 3.0M NaAc pH 5.4 (only for EndoH treatment), 5 µL EndoH  
458 (11643053001, Sigma) or 6 µL PNGaseF (11365177001, Sigma) and diluted with Lysis  
459 buffer to 50 µL. Untreated control samples were prepared without the addition of NaAc,  
460 EndoH or PNGaseF. For StcE treatment, 42 µL cell lysate was mixed with 1 µL active StcE  
461 (5.8 mg/mL). All samples were incubated at 37°C overnight and reduced in 4X reducing  
462 sample buffer (8% SDS, 400mM Dithiothreitol, 40% glycerol, 200 mM Tris pH 6.8, 0.4%  
463 bromophenol blue) followed by boiling at 95°C for 5 min.

464

#### 465 **Immunoblots and in-gel western blots**

466 Samples were separated on precast 4%–12% SDS polyacrylamide gel (XP04125BOX,  
467 ThermoFisher Scientific). Proteins were transferred to a PVDF-FL membrane (05317,  
468 Millipore) with a current of 2.5 mA/cm<sup>2</sup> for 1 h. Membrane was blocked in 5% non-fat milk in  
469 PBS for 30 min and incubated with primary antibodies diluted in 5% non-fat milk in PBS +  
470 0.1% Tween-20 (PBS-T) overnight at 4°C. Membrane was washed three time in PBS-T and  
471 incubated with secondary antibodies diluted in 5% non-fat milk in PBS-t + 0.02% SDS for 1  
472 hour at RT in the dark. Membrane was washed three time in PBS-T and visualized on an  
473 Odyssey CLx near infrared fluorescence imaging system (LI-COR Biosciences). Protein  
474 quantification was performed using Image Studio quantification software (LI-COR  
475 Biosciences). For Coomassie stains, membranes were stained with Imperial Protein Stain

476 (24615, Thermo Scientific), destained in 5% MeOH and 7% Acetic Acid, and visualized on an  
477 Odyssey CLx near infrared fluorescence imaging system (LI-COR Biosciences).

478 Samples for In-gel westerns were separated on precast 4%–12% SDS polyacrylamide gel.  
479 Proteins were fixed by 50% isopropanol + 5% acetic acid in ultrapure water for 15 min. Gel  
480 was washed extensively in ultrapure water 3x15 min and incubated with primary antibodies  
481 diluted in 5% BSA in PBS overnight at 4°C. After 3x10 min washes in PBS-T, gel was  
482 incubated with secondary antibodies diluted in 5% BSA in PBS+0.1% Tween<sup>®</sup> 20 for 2 hours  
483 (RT). Gel was washed 3x10 min in PBS-T and visualized on an Odyssey CLx near infrared  
484 fluorescence imaging system.

485

#### 486 **Biotin proximity labeling by antibody recognition**

487  $3 \times 10^5$  Caco-2 cells seeded on 9.6 mm<sup>2</sup> wells and differentiated for 14 days were washed 2  
488 times with PBS. Cells were fixed with 4% paraformaldehyde in PBS for 15 min at RT and  
489 washed twice in PBS-T. Next, cells were permeabilized in PBS + 0.5% Triton X-100 for 7 min  
490 at RT followed by 3 x 10 min washes with PBS-T. 30 mM H<sub>2</sub>O<sub>2</sub> in PBS was added overnight  
491 at RT to quench endogenous peroxidase activity. Another 30 mM fresh H<sub>2</sub>O<sub>2</sub> in PBS was  
492 added for 10 min followed by two 10 min washes with PBS-T. Cells were incubated with  
493 blocking buffer (5% BSA in PBS) for 2 hours on a shaker and stained with Flag mAb 1:500  
494 diluted in blocking buffer overnight at 4°C in a humid chamber on an orbital shaker. After  
495 three subsequent 1-hour PBS-T washes, cells were incubated with 1:1000 goat anti-mouse  
496 HRP diluted in blocking buffer for 1 hour at RT. Unbound antibody was removed by three 2  
497 hours washes with PBS-T and cells pre-incubated with 500 μM Biotin-Tyramide (final  
498 concentration) at RT. After 10 min, a final concentration of 2.5 mM H<sub>2</sub>O<sub>2</sub> in PBS was added to  
499 the Biotin-Tyramide solution for 2 min at RT. To quench the reaction, 500 μL of 500 mM  
500 sodium ascorbate 3 x 5 min was added to the cells followed by 3 x 10 min washes with PBS-  
501 T. Cells were lysed in 200 μL PBS-T + 2% SDS + 2% deoxycholate + 1X complete protease  
502 inhibitor. The cells were collected by scraping, sonicated for 10 seconds, and boiled at 95°C  
503 for 60 minutes. Samples were cleared by centrifugation at maximum speed for 10 min. The  
504 supernatants were diluted in 1 mL PBS-T and 50 μL saved as input. 20 μL of pre-washed  
505 Streptavidin Dynabeads (11205D, Thermo Fisher Scientific) was added to each sample and  
506 incubated for 48 hours, rotating at 4°C. Beads were washed in 1) 15 mL PBS-T, 2) 15 mL  
507 PBS-T + 1M NaCl, 3) 15 mL PBS, and 4) 15 mL PBS+0.5% Triton X-100. Beads were re-  
508 suspended in PBS and proteins eluted by adding 1 volume of 2X lysis buffer (4% SDS, 200  
509 mM DTT, 125 mM Tris HCl pH 6.8) and boiling at 95°C for 5 min. The eluate was separated  
510 from beads using Costar Spin-X filter units.

511

#### 512 **Sample preparation for LC-MS/MS**



513 Eluted proteins from light and heavy samples prepared with method 1 were mixed at a 1:1  
514 ratio and added onto 10-kDa cutoff-filter (OD010C33, PALL) followed by addition of 1  $\mu$ L  
515 1mM DTT. Eluates prepared by method 2 were directly added onto the cut-off filters. Proteins  
516 were digested with trypsin overnight at 37°C using filter-aided sample preparation (FASP)  
517 [47]. Peptide concentration after elution was measured at 280 nm using NanoDrop (Thermo  
518 Fisher Scientific) and peptides cleaned with StageTip C18 columns [48] prior to mass-  
519 spectrometry (MS) analysis.

520 Eluates from proximity labeling experiments were reduced at 37°C for 60 min with DL-  
521 dithiothreitol (DTT) at 100 mM final concentration and further processed using the modified  
522 filter-aided sample preparation (FASP) method. In short, the samples were diluted 1:4 v/v by  
523 8M urea solution, transferred onto Microcon-30kDa centrifugal units (Merck Millipore,  
524 Carrigtwohill, Ireland), and washed with 8 M urea and with Digestion buffer (0.5% sodium  
525 deoxycholate (SDC) in 50 mM TEAB. Free cysteine residues were modified using 10 mM  
526 methyl methanethiosulfonate (MMTS) solution in Digestion buffer for 20 min at room  
527 temperature and the filters were washed twice with 100  $\mu$ l of Digestion buffer. Proteins were  
528 digested overnight at 37°C by adding 0.3  $\mu$ g of Pierce trypsin protease (MS grade, Thermo  
529 Fisher Scientific), followed by a second incubation with 0.3  $\mu$ g trypsin for three hours.

530 Peptides were collected by centrifugation and labelled using Tandem Mass Tag 10plex  
531 reagent (90061, Thermo Fischer Scientific) according to the manufacturer's instructions. The  
532 labelled samples were combined into one pool, concentrated using vacuum centrifugation,  
533 and SDC was removed by acidification with 10% TFA and subsequent centrifugation. The  
534 digested peptides were cleaned-up using the HiPPR detergent removal resin kit (PN 88305,  
535 Thermo Fisher Scientific, Waltham, MA, USA) according to the manufacturer's instructions.  
536 The sample was subsequently separated into five fractions on Pierce High pH Reversed-  
537 Phase spin column kit (Thermo Fisher Scientific) using stepwise elution with 0.1% aqueous  
538 trimethylamine solution containing 10% to 50.0% of acetonitrile. The fractions were dried and  
539 reconstituted in 15 $\mu$ l of 3% acetonitrile, 0.2% formic acid for LC-MS/MS analysis.

540

#### 541 **Liquid Chromatography-MS/MS**

542 Nano LC-MS/MS for SILAC samples was performed on a Q-Exactive HF mass-spectrometer  
543 (Thermo Fischer Scientific), connected with an EASY-nLC 1000 system (Thermo Fischer  
544 Scientific) through a nanoelectrospray ion source. Peptides were loaded on a reverse-phase  
545 column (150 mm<sup>3</sup> 0.075 mm inner diameter, New Objective, New Objective, Woburn, MA)  
546 packed in-house with Reprosil-Pur C18-AQ 3 mm particles (Dr. Maisch, Ammerbuch,  
547 Germany). Peptides were separated with a 50-minute gradient: from 5 to 30% B in 35 min,  
548 30 to 45% B in 5 min, 45 to 100% B in 1 min, followed 9 min wash with 100% of B (A: 0.1%  
549 formic acid, B: 0.1% formic acid/80% acetonitrile) using a flow rate of 250 nl/min. Q-Exactive

550 HF was operated at 250°C capillary temperature and 2.0 kV spray voltage. Full mass spectra  
551 were acquired in the Orbitrap mass analyzer over a mass range from m/z 350 to 1600 with  
552 resolution of 60,000 (m/z 200) after accumulation of ions to a  $3 \times 10^6$  target value based on  
553 predictive AGC from the previous full scan. Fifteen most intense peaks with a charge state  $\geq$   
554 2 were fragmented in the HCD collision cell with normalized collision energy of 27%, and  
555 tandem mass spectrum was acquired in the Orbitrap mass analyzer with resolution of 15,000  
556 after accumulation of ions to a  $1 \times 10^5$  target value. Dynamic exclusion was set to 20 s. The  
557 maximum allowed ion accumulation times were 20 ms for full MS scans and 50 ms for  
558 tandem mass spectrum.

559 TMT labelled fractions were analyzed on an Orbitrap Fusion Lumos Tribrid mass  
560 spectrometer interfaced with an Easy-nLC 1200 liquid chromatography system (both Thermo  
561 Fisher Scientific). Peptides were trapped on an Acclaim Pepmap 100 C18 trap column (100  
562  $\mu\text{m} \times 2 \text{ cm}$ , particle size 5  $\mu\text{m}$ , Thermo Fischer Scientific) and separated on an analytical  
563 column (75  $\mu\text{m} \times 35 \text{ cm}$ , packed in-house with Reprosil-Pur C18, particle size 3  $\mu\text{m}$ , Dr.  
564 Maisch, Ammerbuch, Germany) using a linear gradient from 5% to 33% B over 77 min  
565 followed by an increase to 100% B for 3 min, and 100% B for 10 min at a flow of 300 nL/min.  
566 Solvent A was 0.2% formic acid in water and solvent B was 80% acetonitrile, 0.2% formic  
567 acid. MS scans were performed at 120,000 resolution in the m/z range 375-1375. The most  
568 abundant doubly or multiply charged precursors from the MS1 scans were isolated using the  
569 quadrupole with 0.7 m/z isolation window with a “top speed” duty cycle of 3 s and dynamic  
570 exclusion within 10 ppm for 45 seconds. The isolated precursors were fragmented by  
571 collision induced dissociation (CID) at 35% collision energy with the maximum injection time  
572 of 50 ms and detected in the ion trap, followed by multinotch (simultaneous) isolation of the  
573 top 10 MS2 fragment ions within the m/z range 400-1400, fragmentation (MS3) by higher-  
574 energy collision dissociation (HCD) at 65% collision energy and detection in the Orbitrap at  
575 50,000 resolution, m/z range 100-500 and maximum injection time 105 ms.

576

### 577 **MS data analysis**

578 MS raw files from SILAC experiments were processed with MaxQuant software version  
579 1.5.7.4 [49], peak lists were identified by searching against the human UniProt protein  
580 database (downloaded 2019.04.16) supplemented with an in-house database containing all  
581 the human mucin sequences (<http://www.medkem.gu.se/mucinbiology/databases/>).  
582 Searches were performed using trypsin as an enzyme, maximum 2 missed cleavages,  
583 precursor tolerance of 20 ppm in the first search used for recalibration, followed by 7 ppm for  
584 the main search and 0.5Da for fragment ions. Carbamidomethylation of cysteine was set as  
585 a fixed modification. Methionine oxidation, protein N-terminal acetylation and 3-  
586 (carbamidomethyl-thio)propanoyl (DSP-crosslinker) were set as variable modifications. Arg6

587 and Lys6 were chosen as label modifications. The required false discovery rate (FDR) was  
588 set to 1% both for peptide and protein levels and the minimum required peptide length was  
589 set to seven amino acids.

590 SILAC data was analyzed with Perseus (version 1.5.5.0). First, proteins identified in the  
591 decoy database were removed together with proteins only identified by site and common  
592 contaminants. Heavy and light intensities were  $\log_2$  transformed and filtered based on valid  
593 values in at least one group (heavy or light). Missing values were imputed based on the  
594 normal distribution of measured values using default values (width=0.3 and downshift=1.8).  
595 Significantly enriched proteins were determined with a two-sided t-test and permutation-FDR  
596 =0.05,  $S_0=0.1$  and 250 randomizations. These proteins were also manually validated as  
597 previously described [50].

598 Identification and relative quantification of TMT samples from proximity labelling was  
599 performed using Proteome Discoverer version 2.4 (Thermo Fisher Scientific). The database  
600 search was performed using the Mascot search engine v. 2.5.1 (Matrix Science, London, UK)  
601 against the Swiss-Prot Homo sapiens database. Trypsin was used as a cleavage rule with no  
602 missed cleavages allowed; methylthiolation on cysteine residues, TMT at peptide N-termini  
603 and on lysine side chains were set as static modifications, and oxidation on methionine was  
604 set as a dynamic modification. Precursor mass tolerance was set at 5 ppm and fragment ion  
605 tolerance at 0.6 Da. Percolator was used for the peptide-spectrum match (PSM) validation  
606 with the strict false discovery rate (FDR) threshold of 1%. Quantification was performed in  
607 Proteome Discoverer 2.4. The TMT reporter ions were identified with 3 mmu mass tolerance  
608 in the MS3 HCD spectra and the TMT reporter S/N values for each sample were normalized  
609 within Proteome Discoverer 2.4 on the total peptide amount. Only the unique identified  
610 peptides were considered for the protein quantification.

611

### 612 **Immunofluorescence and image analysis**

613 Staining of Caco-2 cells grown on chamber slides (154534PK, Thermo Fisher Scientific)  
614 were performed as described previously [24]. In brief, cells were washed 3 times in warm  
615 PBS followed by 10 min fixation in 4% paraformaldehyde (PFA) in PBS at RT. Excess PFA  
616 was washed away with 3 PBS washes and cells permeabilized by 0.1% Triton X-100 in PBS  
617 for 7 min. After permeabilization, cells were washed three times with PBS and blocked  
618 overnight in 5% BSA in PBS at 4°C. Cells were incubated with primary antibodies diluted in  
619 5% BSA in PBS for 2 hours at 24°C, then washed 3 times with PBS and incubated with  
620 secondary antibodies for 1 hour at RT. After three washes with PBS, cell nuclei were stained  
621 with Hoechst for 7 min at RT. Chamber slides were washed 3 times with PBS and mounted  
622 with Prolong anti-fade (Invitrogen).

623 Harvested ileum was fixed in Carnoy's fixative (60% absolute methanol, 30% chloroform and  
624 10% glacial acetic acid) or 4% paraformaldehyde (PFA) solution. Samples fixed in Carnoy's  
625 fixative were embedded in paraffin. Paraffin-embedded sections were deparaffinized in  
626 xylene substitute (2 3 10 min, 60°C) and rehydrated in 100% ethanol (10 min), 70% (v/v)  
627 ethanol (5 min), 50% (v/v) ethanol (5 min), and 30% (v/v) ethanol (5 min). Sections were  
628 placed in antigen retrieval buffer (0.01M citric acid, pH 6.0) at 100 degrees for 10 min and  
629 then brought to RT (2 hours) and transferred to PBS. Tissues were enclosed with a PAP pen  
630 followed and blocked with 5% fetal calve serum (FCS) in PBS for 20 min at RT. Primary  
631 antibodies were diluted in 5% FCS in PBS and incubated overnight at 4°C. After 3x5 min  
632 washes in PBS, sections were incubated with secondary antibodies diluted in 5% FCS in  
633 PBS. DNA was stained with Hoechst for 5 min at RT. Coverslips were mounted using  
634 Prolong Gold antifade (P36980, ThermoFisher Scientific) and polymerized overnight at RT in  
635 the dark. Images and Z-stacks were acquired on a Zeiss LSM 700 (Plan-Apochromat 40x/1.3  
636 Oil DIC M27 lens and 1.58µs pixel dwell) and a Zeiss LSM900 (equipped with an Airyscan2  
637 detector and plan-Apochromat 63x/1.4 Oil DIC M27 lens). All image analysis and processing  
638 were performed in ImageJ software v.1.53.t (National Institutes of Health, Bethesda, MD).  
639 Confocal images are shown as maximum projections except from YZ and XZ sections. Line  
640 intensity profiles were generated from z-axis profiles for each individual channel, averaged to  
641 15 µm distance from the basolateral to apical membrane and normalized to values between  
642 0-100.

643

#### 644 **Transmission electron microscopy**

645 MUC17(7TR) Caco-2 cells grown on Transwell filters (CLS3496, Merck) for 7, 14 and 21  
646 DPC were fixed in primary fixative (1.33% glutaraldehyde in water, 0.1 M cacodylate buffer,  
647 0.05% Ruthenium Red in water) for 1 hour at RT. Fixed cells were pre-washed in 0.05 M  
648 cacodylate buffer and then washed extensively in 2x10 min 0.05 M cacodylate buffer, 20 min  
649 0.05 M cacodylate buffer + 0.02 M glycine followed by 2x10 min 0.05 M cacodylate buffer.  
650 Secondary fixative (1.33% osmium tetroxide in water, 0.1 M cacodylate buffer, 0.05%  
651 Ruthenium Red in water) was added to the cells for 1 hour and incubated at 4 °C in the dark  
652 on an orbital shaker. Secondary fixative was removed by a few quick washes in water  
653 followed by 6x5 min washes in water. Cells were incubated with tertiary fixative (1% filtered  
654 aqueous uranyl acetate) for 30 min at room temperature in the dark followed by a few  
655 washes with water. Excised membranes were stained in lead aspartate (0.02 M lead nitrate  
656 and 0.03M aspartic acid pH 5.5) for 20 min at RT. Cells were washed three times in water,  
657 incubated overnight in water followed by another three washes in water. Dehydration of cells  
658 was done in a series of ethanol solutions at RT (5 min 30% EtOH, 5 min 50% EtOH, 5 min  
659 70% EtOH, 5 min 85% EtOH, 5 min 95% EtOH, 5x5 min 100% EtOH). The cells were

660 embedded in Hard-Plus Epoxy 812-resin (14115, Electron Microscopy Sciences, US) at RT  
661 as follows. 25% resin in acetone for 1 hour, 50% resin 2 hours, 75% resin 1 hour, 100% resin  
662 3x30 min and 100% resin overnight on an orbital shaker. After another incubation of 2 x 1  
663 hour 100% resin, samples were incubated with 100% resin + accelerator (240  $\mu$ L/10 mL) for  
664 1 hour and another 100% + accelerator for several hours. Infiltrated samples were embedded  
665 in resin-silicon free molds with resin + accelerator and let to polymerize for 48 hours at 60°C.  
666 Transversal ultrathin sectioning (70-90 nm) of cells from the apical to basolateral membrane  
667 were performed on Leica UC6 Ultracut, collected on copper 100 hexagonal mesh support  
668 grids and post stained with Reynold's solution [51] at RT for 5 min in a sealed chamber with  
669 NaOH-pellets. Sections were imaged on TEM FEI Talos (ThermoFisher, US) equipped with  
670 4kx4k Ceta CMOS camera operating at 120 kV with LaB6 filament.

671

### 672 **Fluorescence Recovery After Photobleaching (FRAP)**

673 StcE E447D was labeled with CF 555 Succinimidyl Ester (92214, Biotium) according to  
674 manufacturer's protocol. 500  $\mu$ L serum-free medium containing 10 $\mu$ g/mL of CF555-StcE  
675 E447D (RT) was added to WT and knockout Caco-2 cells differentiated on 30 mm plates for  
676 30 min. After two washes with 3 mL PBS (RT), images were acquired using LSM700 with a  
677 plan-apochromat x 20/1.0 DIC M27 75 mm water objective (Zeiss) at 1.5 digital zoom and  
678 ZEN 2010 software. Photobleaching at 100% laser power for a duration of 25  $\mu$ sec was  
679 performed after 5 initial scans (pixel dwell per scan) using the 555 nm laser. Four 20  $\mu$ m x 20  
680  $\mu$ m square regions of interest (ROIs) were selected according to the following scheme:  
681 ROI1: analyze in cell 1 (bleach control) and ROI2: bleach and analyze in cell 2. Recovery  
682 images were acquired every 2 seconds during 12 min. Raw data were analyzed by the  
683 formula,

684

$$685 \quad Norm(t) = \frac{Ref_{pre-bleach}}{ref(t)} \cdot \frac{FRAP(t)}{FRAP_{pre-bleach}} \quad (1)$$

$$686 \quad Norm_{0-1}(t) = Norm_{min} - Norm(t) \quad (2)$$

687

688 Where  $Ref_{pre-bleach}$  is the mean intensity of ROI1 before bleaching,  $FRAP_{pre-bleach}$  is the mean  
689 intensity of the ROI2 pre bleaching,  $ref(t)$  is the intensity of ROI1 at time point t,  $FRAP(t)$  in  
690 the intensity of ROI2 at time point t.  $Norm(t)$  represent fluorescence in ROI2 at time (t)  
691 corrected for bleaching during analysis recovery.  $Norm_{0-1}(t)$  sets the mean intensity of ROI2  
692 before bleaching to 1 and after bleaching to 0. Recovery halftimes and mobile fractions were  
693 extracted by fitting the data to a non-linear curve based on a one-phase association.

694

### 695 **Quantification and statistical analysis**

696 Data analysis was performed using GraphPad Prism (version 9.5) and Perseus (version  
697 1.5.5.0). Graphs were prepared using either Perseus (version 1.5.5.0) or GraphPad Prism  
698 (version 9.5). Venn Diagrams were created using: [https://bioinformatics.psb.ugent.be/  
699 webtools/Venn/](https://bioinformatics.psb.ugent.be/webtools/Venn/). One- or two-way ANOVA followed by Tukey's or Sidak's multiple  
700 comparisons test or Kruskal Wallis and Dunn's multiple comparisons test was done for  
701 comparisons of multiple groups. Unpaired t-test with Welch's correction, assuming non-equal  
702 SDs was used for comparison of two groups. \* $p < 0.05$ , \*\* $p < 0.01$ , \*\*\* $p < 0.001$ , \*\*\*\* $p < 0.0001$ .

703

#### 704 **Author contributions**

705 Conceptualization, S.J. and T.P.; methodology, S.J. and T.P.; investigation, S.J., G.H., I.K.,  
706 and T.P.; writing – original draft, S.J. and T.P.; writing – review & editing, S.J., I.K. J.R.G.,  
707 and T.P.; funding acquisition, S.J., I.K., J.R.G., and T.P.; resources, T.P.; supervision, T.P.

708

#### 709 **Acknowledgements**

710 We acknowledge Drs. Carina Sihlbom, Egor Vorontsov, and Evelin Berger at the Proteomics  
711 Core Facility of Sahlgrenska Academy (University of Gothenburg) for performing TMT  
712 proteomic analysis. We thank colleagues at the Centre for Cellular Imaging Core Facility of  
713 Sahlgrenska Academy (University of Gothenburg) for sample preparation and image  
714 acquisition for transmission electron microscopy. This study was supported by the Swedish  
715 Society for Medical Research (grant S17-0005) to T.P., National Institutes of Health (NIH)  
716 (grants 5U01AI095542-08-WU-19-95 and 5U01AI095542-09-WU-20-77) to T.P., NIH (grants  
717 RC2 DK118640 and R01 DK48370) to J.R.G., NIH (grant R01 DK128190) to I.K., Wenner-  
718 Gren Foundations (grant FT2017-0002) to T.P., Jeansson Foundations (grant JS2017-0003)  
719 to TP, Åke Wiberg Foundation (grant M17-0062) to T.P., Stiftelsen Clas Groschinskys  
720 Minnesfond (grant M2254) to T.P., and Sahlgrenska Academy doctoral project grant (grant  
721 U2018/162) to S.J. and T.P..

722

#### 723 **Figure legends**

##### 724 **Figure 1. MUC17(7TR) localizes apically in Caco-2 cells.**

725 A) Schematic representation of recombinant 3xFlag-MUC17(7TR). TR: tandem repeat, SEA:  
726 sea urchin sperm protein, enterokinase and agrin, TM: transmembrane domain, CT:  
727 cytoplasmic tail domain, PBM: PDZ-binding motif. Epitopes for the fragment-specific  
728 antibodies used in this study are highlighted (FLAG, MUC17-S1, MUC17-S2, and MUC17-  
729 C1).

730 B) Confocal images of Caco-2 cells stained for MUC17, Ezrin, F-actin, and nuclear DNA.  
731 Scale bars=10  $\mu$ m.

732 C) Intensity profiles of MUC17 distribution in WT and MUC17(7TR) Caco-2 cells. n=3 scans  
733 and a mean of 73 cells per group.

734 D) Cell lysates of WT and MUC17(7TR) cells treated with PNGaseF, EndoH and StcE, and  
735 analyzed by immunoblotting (IB) or in-gel western, and probed with Flag, MUC17-C1, and  
736 MUC17-S1 antibodies. Filled and empty arrowheads represent fully mature and immature  
737 protein, respectively.

738 E) Assessment of MUC17(7TR) localization during cell differentiation during 1 – 21 dpc.  
739 Scale bars=10  $\mu$ m, n = 3 scans with a mean of 60 cells per time point.

740 F) Intensity profiles of MUC17(7TR) distribution in relation to CDHR5 during cell  
741 differentiation.

742 G) TEM micrographs of the glycocalyx during 7, 14 and 21 dpc. Scale bars = 500  $\mu$ m.

743 H) Microvillar density and microvillar length measured from TEM micrographs. \*p< 0.05,  
744 \*\*\*p<0.001, \*\*\*\*p<0.0001 as determined by one-way ANOVA followed by Tukey's multiple  
745 comparisons test.

746

747 **Figure 2. Exploring the interactome of MUC17(7TR) using quantitative proteomics.**

748 A) Schematic representation of the workflow for identifying MUC17 interaction partners.

749 B) PCA plot of MUC17(7TR) (Heavy) and WT (Light) samples prepared with IGEPAL  
750 (Method 1).

751 C) Volcano plot of MUC17(7TR) (orange) and WT (blue) samples prepared by Method 1.

752 D) Comparisons of all identified proteins (upper) and significantly enriched proteins (lower)  
753 identified in C.

754 E) PCA plot of crosslinked MUC17(7TR) (heavy) and WT (light) samples prepared with SDS  
755 (Method 2).

756 F) Volcano plot of MUC17(7TR) (orange) and WT (blue) samples prepared by Method 2.

757 G) Comparison of Method 1 and 2 based on all proteins identified (upper) and significantly  
758 enriched proteins identified in F.

759

760 **Figure 3. SNX27 interacts with membrane mucin MUC17.**

761 A) Confocal images of MUC17(7TR), SNX27 or MYO1B co-stained with F-actin and nuclear  
762 DNA.

763 B) High resolution Airyscan images of the brush border of WT MUC17(7TR) cells stained for  
764 MUC17(7TR), MYO1B or SNX27, and F-actin. Scale bars = 5  $\mu$ m.

765 C) Sections of mouse ileum stained for Ezrin, Myo1b, and nuclear DNA (top) and Muc17,  
766 Snx27, and DNA (bottom). Arrows in insets mark the brush border region. Scale bars = 100  
767  $\mu$ m.

768 D) Confocal images of MUC17 together with recombinant EGFP-SNX27 or HA-Myo1B co-  
769 stained for F-actin and nuclear DNA. Scale bars = 5  $\mu$ m.

770 E) A representative immunoblot of co-immunoprecipitations in HEK 293 cells expressing  
771 3xFlag-MUC17(7TR) and either EGFP-SNX27 or EGFP-SNX27 $\Delta$ PDZ. Lysates represent 2%  
772 of the total cell lysate whereas 40% of the eluates was loaded on the gel.

773

774 **Figure 4. MUC17 resides intracellularly in enterocytes carrying a MYO5B deletion.**

775 A) Ileal sections from *Myo5b<sup>fl/fl</sup>;Vil1-CreERT* mice, injected with vehicle or tamoxifen, stained  
776 for Muc17, Ezrin and nuclear DNA.

777 B) Intensity profiles of Muc17 and Ezrin in brush border regions in A.

778 C) Confocal images of WT and *MYO5B<sup>-/-</sup>* MUC17(7TR) Caco-2 cells stained for  
779 MUC17(7TR), Ezrin, F-actin, and nuclear DNA. Scale bars=20 $\mu$ m.

780 D) Intensity profiles of MUC17(7TR) distribution in WT and *MYO5B<sup>-/-</sup>* Caco-2 cells in relation  
781 to Ezrin in C.

782 E) Semi-quantitative analysis of intensity profiles in D. Data are presented as mean  $\pm$  SD and  
783 analyzed by two-way ANOVA corrected for multiple comparison using Sidak. \* $p$ <0.05 and  
784 \*\* $p$ <0.01.

785

786 **Figure 5. MYO5B regulates MUC17 trafficking to the plasma membrane.**

787 A) Surface biotinylation of WT, WT MUC17(7TR), *MYO5B<sup>-/-</sup>* and *MYO5B<sup>-/-</sup>* MUC17(7TR)  
788 Caco-2 cells analyzed by immunoblotting.

789 B) Semi-quantitative analysis of band densities in A for total and surface pools of MUC17.  
790 Data are presented as mean  $\pm$  SD. \*\* $p$ <0.01 as determined by unpaired t-test with Welch's  
791 correction, assuming non-equal SD.

792 C) Schematic illustration of biotin proximity labeling of proteins in close proximity to  
793 MUC17(7TR).

794 D) Immunoblot of eluates from biotin proximity labeling experiments of WT MUC17(7TR) and  
795 *MYO5B<sup>-/-</sup>* MUC17(7TR) Caco-2 cells.

796 E) Volcano plot of proteins enriched in WT MUC17(7TR) and *MYO5B<sup>-/-</sup>* MUC17(7TR) Caco-  
797 2 cells from the biotin proximity labeling experiment.

798 F) Significantly enriched proteins for WT MUC17(7TR) (blue) and *MYO5B<sup>-/-</sup>* MUC17(7TR)  
799 (orange) Caco-2 cells.

800 G) Visualization of intracellular compartments defined by the proximal proteome of  
801 MUC17(7TR) in WT (blue) and *MYO5B<sup>-/-</sup>* (orange) Caco-2 cells.

802

803 **Figure 6. MYO1B regulates MUC17 protein levels.**



804 A) Confocal images of WT MUC17(7TR) and *MYO1B*<sup>-/-</sup> MUC17(7TR), and *SNX27*<sup>-/-</sup>  
805 MUC17(7TR) Caco-2 cells stained for MUC17(7TR), Ezrin, F-actin, and DNA. Scale bars=20  
806  $\mu$ m.  
807 B) Intensity profiles of MUC17(7TR) distribution in WT and KO cells. n=3 scans and 76 cells  
808 per cell line.  
809 C) Determination of MUC17(7TR) protein levels in WT, WT MUC17(7TR) and cells lacking  
810 either MYO1B or SNX27 (upper panel). Lower panel represents quantitative analysis of  
811 protein levels in WT and KO cells. Data are presented as mean  $\pm$  SD. \*\*p<0.01 as  
812 determined by unpaired t-test with Welch's correction, assuming non-equal SD.  
813 D) Quantification of cells displaying microvillar clusters in WT, WT MUC17(7TR) and  
814 *MYO5B*<sup>-/-</sup>, *MYO1B*<sup>-/-</sup>, *SNX27*<sup>-/-</sup> MUC17(7TR) cells given as percentage. \*p<0.05 as  
815 determined by one-way ANOVA and Dunnett's multiple comparisons test. n = 3-4 scans with  
816 a mean of 358 cells measured per cell line.  
817 E) High resolution Airyscan images of MUC17(7TR) distribution in relation to Ezrin in the  
818 brush border region of WT and *MYO1B*<sup>-/-</sup>, *SNX27*<sup>-/-</sup> MUC17 cells. Scale bars = 5  $\mu$ m.  
819

820 **Figure 7. Reduced apical MUC17 targeting in MYO1B-deficient cells.**

821 A) Densitometric analysis of total MUC17(7TR) normalized to total loaded protein for each  
822 cell lysates used for StcE AP in B. Data are presented as mean  $\pm$  SD \*p<0.05 as determined  
823 by Kruskal Wallis and Dunn's multiple comparisons test.  
824 B) Assessment of maturation of MUC17(7TR) by affinity purification using StcE E447D in  
825 WT, MUC17(7TR)-expressing WT and KO Caco-2 cells. Eluates (40%) were analyzed by  
826 immunoblotting (left and middle panel) or in-gel western (right panel) using Flag, MUC17-C1  
827 or MUC17-S1 antibodies.  
828 C) Confocal images of WT, MUC17(7TR) or *MYO5B*<sup>-/-</sup>, *MYO1B*<sup>-/-</sup>, *SNX27*<sup>-/-</sup> MUC17(7TR)  
829 cells stained with MUC17 and fluorescently conjugated StcE E447D, alongside YZ  
830 orthogonal projections.  
831 D) Intensity profiles of MUC17(7TR) (upper) and StcE E447D (lower) for WT and KO cells in  
832 C. n=3 scans and a mean of 82 cells per cell line.  
833 E) Proportion of MUC17(7TR) signal that overlaps with StcE E447D in C. Data are presented  
834 as mean  $\pm$  SD and analyzed by two-way ANOVA corrected for multiple comparison using  
835 Sidak, \*p<0.05, \*\*p<0.01, \*\*\*p<0.001.  
836 F) Curves representing recovery after photobleaching of MUC17(7TR)-bound StcE E447D in  
837 the plasma membrane. n=19-23 per group.  
838 G) Halftime and Mobile fraction for WT and KO cells extracted from F. Data for each group  
839 are represented with 95% confidence intervals.

840

841 **References**

- 842 1. Johansson, M.E., H. Sjovall, and G.C. Hansson, *The gastrointestinal mucus system*  
843 *in health and disease*. Nat Rev Gastroenterol Hepatol, 2013. **10**(6): p. 352-61.
- 844 2. Johansson, M.E., et al., *The inner of the two Muc2 mucin-dependent mucus layers in*  
845 *colon is devoid of bacteria*. Proc Natl Acad Sci U S A, 2008. **105**(39): p. 15064-9.
- 846 3. Sun, W.W., et al., *Nanoarchitecture and dynamics of the mouse enteric glycocalyx*  
847 *examined by freeze-etching electron tomography and intravital microscopy*. Commun  
848 Biol, 2020. **3**(1): p. 5.
- 849 4. Pelaseyed, T., et al., *Carbachol-induced MUC17 endocytosis is concomitant with*  
850 *NHE3 internalization and CFTR membrane recruitment in enterocytes*. Am J Physiol  
851 Cell Physiol, 2013. **305**(4): p. C457-67.
- 852 5. Layunta, E., et al., *IL-22 promotes the formation of a MUC17 glycocalyx barrier in the*  
853 *postnatal small intestine during weaning*. Cell Rep, 2021. **34**(7): p. 108757.
- 854 6. Malmberg, E.K., et al., *The C-terminus of the transmembrane mucin MUC17 binds to*  
855 *the scaffold protein PDZK1 that stably localizes it to the enterocyte apical membrane*  
856 *in the small intestine*. Biochem J, 2008. **410**(2): p. 283-9.
- 857 7. Pelaseyed, T. and G.C. Hansson, *Membrane mucins of the intestine at a glance*.  
858 Journal of Cell Science, 2020. **133**(5): p. jcs240929.
- 859 8. Akhavan, A., et al., *SEA domain proteolysis determines the functional composition of*  
860 *dystroglycan*. FASEB J, 2008. **22**(2): p. 612-21.
- 861 9. Macao, B., et al., *Autoproteolysis coupled to protein folding in the SEA domain of the*  
862 *membrane-bound MUC1 mucin*. Nat Struct Mol Biol, 2006. **13**(1): p. 71-6.
- 863 10. Pelaseyed, T., et al., *Unfolding dynamics of the mucin SEA domain probed by force*  
864 *spectroscopy suggest that it acts as a cell-protective device*. Febs j, 2013. **280**(6): p.  
865 1491-501.
- 866 11. Schneider, H., et al., *The human transmembrane mucin MUC17 responds to*  
867 *TNFalpha by increased presentation at the plasma membrane*. Biochem J, 2019.
- 868 12. Schneider, H., et al., *Study of mucin turnover in the small intestine by in vivo labeling*.  
869 Scientific Reports, 2018. **8**(1).
- 870 13. Creamer, B., R.G. Shorter, and J. Bamforth, *The turnover and shedding of epithelial*  
871 *cells. I. The turnover in the gastro-intestinal tract*. Gut, 1961. **2**(2): p. 110-8.
- 872 14. Barker, N., *Adult intestinal stem cells: critical drivers of epithelial homeostasis and*  
873 *regeneration*. Nat Rev Mol Cell Biol, 2014. **15**(1): p. 19-33.
- 874 15. Cheng, H. and C.P. Leblond, *Origin, differentiation and renewal of the four main*  
875 *epithelial cell types in the mouse small intestine. V. Unitarian Theory of the origin of*  
876 *the four epithelial cell types*. Am J Anat, 1974. **141**(4): p. 537-61.

- 877 16. Arike, L., et al., *Protein Turnover in Epithelial Cells and Mucus along the*  
878 *Gastrointestinal Tract Is Coordinated by the Spatial Location and Microbiota*. Cell  
879 Rep, 2020. **30**(4): p. 1077-1087.e3.
- 880 17. Mostov, K., et al., *Plasma membrane protein sorting in polarized epithelial cells*. J  
881 Cell Biol, 1992. **116**(3): p. 577-83.
- 882 18. Gallon, M. and P.J. Cullen, *Retromer and sorting nexins in endosomal sorting*.  
883 Biochem Soc Trans, 2015. **43**(1): p. 33-47.
- 884 19. Peterson, M.D. and M.S. Mooseker, *Characterization of the enterocyte-like brush*  
885 *border cytoskeleton of the C2BBE clones of the human intestinal cell line, Caco-2*. J  
886 Cell Sci, 1992. **102 ( Pt 3)**: p. 581-600.
- 887 20. Thul, P.J., et al., *A subcellular map of the human proteome*. Science, 2017.  
888 **356**(6340).
- 889 21. Schneider, H., et al., *The human transmembrane mucin MUC17 responds to TNF $\alpha$  by*  
890 *increased presentation at the plasma membrane*. Biochem J, 2019. **476**(16): p. 2281-  
891 2295.
- 892 22. Lathem, W.W., et al., *StcE, a metalloprotease secreted by Escherichia coli O157:H7,*  
893 *specifically cleaves C1 esterase inhibitor*. Mol Microbiol, 2002. **45**(2): p. 277-88.
- 894 23. Buhrke, T., I. Lengler, and A. Lampen, *Analysis of proteomic changes induced upon*  
895 *cellular differentiation of the human intestinal cell line Caco-2*. Dev Growth Differ,  
896 2011. **53**(3): p. 411-26.
- 897 24. Crawley, S.W., et al., *Intestinal brush border assembly driven by protocadherin-based*  
898 *intermicrovillar adhesion*. Cell, 2014. **157**(2): p. 433-446.
- 899 25. Smith, A.L., et al., *ReCLIP (reversible cross-link immuno-precipitation): an efficient*  
900 *method for interrogation of labile protein complexes*. PLoS One, 2011. **6**(1): p.  
901 e16206.
- 902 26. Komaba, S. and L.M. Coluccio, *Myosin 1b Regulates Amino Acid Transport by*  
903 *Associating Transporters with the Apical Plasma Membrane of Kidney Cells*. PLoS  
904 One, 2015. **10**(9): p. e0138012.
- 905 27. Bannert, K., et al., *SNX27 regulates DRA activity and mediates its direct recycling by*  
906 *PDZ-interaction in early endosomes at the apical pole of Caco2 cells*. Am J Physiol  
907 Gastrointest Liver Physiol, 2020. **318**(5): p. G854-g869.
- 908 28. Gallon, M., et al., *A unique PDZ domain and arrestin-like fold interaction reveals*  
909 *mechanistic details of endocytic recycling by SNX27-retromer*. Proc Natl Acad Sci U  
910 S A, 2014. **111**(35): p. E3604-13.
- 911 29. Weis, V.G., et al., *Loss of MYO5B in mice recapitulates Microvillus Inclusion Disease*  
912 *and reveals an apical trafficking pathway distinct to neonatal duodenum*. Cell Mol  
913 Gastroenterol Hepatol, 2016. **2**(2): p. 131-157.

- 914 30. Kravtsov, D., et al., *Myosin 5b loss of function leads to defects in polarized signaling: implication for microvillus inclusion disease pathogenesis and treatment*. *Am J Physiol Gastrointest Liver Physiol*, 2014. **307**(10): p. G992-G1001.
- 915  
916
- 917 31. Dhekne, H.S., et al., *MYO5B, STX3, and STXBP2 mutations reveal a common disease mechanism that unifies a subset of congenital diarrheal disorders: A mutation update*. *Hum Mutat*, 2018. **39**(3): p. 333-344.
- 918  
919
- 920 32. Pelaseyed, T. and G.C. Hansson, *CFTR anion channel modulates expression of human transmembrane mucin MUC3 through the PDZ protein GOPC*. *J Cell Sci*, 2011. **124**(Pt 18): p. 3074-83.
- 921  
922
- 923 33. Steinberg, F., et al., *A global analysis of SNX27-retromer assembly and cargo specificity reveals a function in glucose and metal ion transport*. *Nat Cell Biol*, 2013. **15**(5): p. 461-71.
- 924  
925
- 926 34. Engevik, M.A. and A.C. Engevik, *Myosins and membrane trafficking in intestinal brush border assembly*. *Curr Opin Cell Biol*, 2022. **77**: p. 102117.
- 927
- 928 35. Geeves, M.A., C. Perreault-Micale, and L.M. Coluccio, *Kinetic analyses of a truncated mammalian myosin I suggest a novel isomerization event preceding nucleotide binding*. *J Biol Chem*, 2000. **275**(28): p. 21624-30.
- 929  
930
- 931 36. Coluccio, L.M. and M.A. Geeves, *Transient kinetic analysis of the 130-kDa myosin I (MYR-1 gene product) from rat liver. A myosin I designed for maintenance of tension?* *J Biol Chem*, 1999. **274**(31): p. 21575-80.
- 932  
933
- 934 37. Salas-Cortes, L., et al., *Myosin Ib modulates the morphology and the protein transport within multi-vesicular sorting endosomes*. *J Cell Sci*, 2005. **118**(Pt 20): p. 4823-32.
- 935  
936
- 937 38. Almeida, C.G., et al., *Myosin 1b promotes the formation of post-Golgi carriers by regulating actin assembly and membrane remodelling at the trans-Golgi network*. *Nat Cell Biol*, 2011. **13**(7): p. 779-89.
- 938  
939
- 940 39. Engevik, A.C., et al., *Loss of MYO5B Leads to Reductions in Na(+) Absorption With Maintenance of CFTR-Dependent Cl(-) Secretion in Enterocytes*. *Gastroenterology*, 2018. **155**(6): p. 1883-1897.e10.
- 941  
942
- 943 40. Bowman, D.M., I. Kaji, and J.R. Goldenring, *Altered MYO5B Function Underlies Microvillus Inclusion Disease: Opportunities for Intervention at a Cellular Level*. *Cellular and Molecular Gastroenterology and Hepatology*, 2022. **14**(3): p. 553-565.
- 944  
945
- 946 41. Roland, J.T., et al., *Rab GTPase-Myo5B complexes control membrane recycling and epithelial polarization*. *Proc Natl Acad Sci U S A*, 2011. **108**(7): p. 2789-94.
- 947
- 948 42. Yamagata, M., X. Duan, and J.R. Sanes, *Cadherins Interact With Synaptic Organizers to Promote Synaptic Differentiation*. *Front Mol Neurosci*, 2018. **11**: p. 142.
- 949

- 950 43. Cong, L., et al., *Multiplex genome engineering using CRISPR/Cas systems*. Science,  
951 2013. **339**(6121): p. 819-23.
- 952 44. Ran, F.A., et al., *Genome engineering using the CRISPR-Cas9 system*. Nat Protoc,  
953 2013. **8**(11): p. 2281-2308.
- 954 45. Pankow, S., et al., *Deep interactome profiling of membrane proteins by co-interacting  
955 protein identification technology*. Nat Protoc, 2016. **11**(12): p. 2515-2528.
- 956 46. Malaker, S.A., et al., *The mucin-selective protease StcE enables molecular and  
957 functional analysis of human cancer-associated mucins*. Proc Natl Acad Sci U S A,  
958 2019. **116**(15): p. 7278-7287.
- 959 47. Wisniewski, J.R., et al., *Universal sample preparation method for proteome analysis*.  
960 Nat Methods, 2009. **6**(5): p. 359-62.
- 961 48. Rappsilber, J., M. Mann, and Y. Ishihama, *Protocol for micro-purification, enrichment,  
962 pre-fractionation and storage of peptides for proteomics using StageTips*. Nat Protoc,  
963 2007. **2**(8): p. 1896-906.
- 964 49. Cox, J. and M. Mann, *MaxQuant enables high peptide identification rates,  
965 individualized p.p.b.-range mass accuracies and proteome-wide protein  
966 quantification*. Nat Biotechnol, 2008. **26**(12): p. 1367-72.
- 967 50. Emmott, E. and I. Goodfellow, *Identification of protein interaction partners in  
968 mammalian cells using SILAC-immunoprecipitation quantitative proteomics*. J Vis  
969 Exp, 2014(89).
- 970 51. Reynolds, E.S., *The use of lead citrate at high pH as an electron-opaque stain in  
971 electron microscopy*. J Cell Biol, 1963. **17**(1): p. 208-12.

972

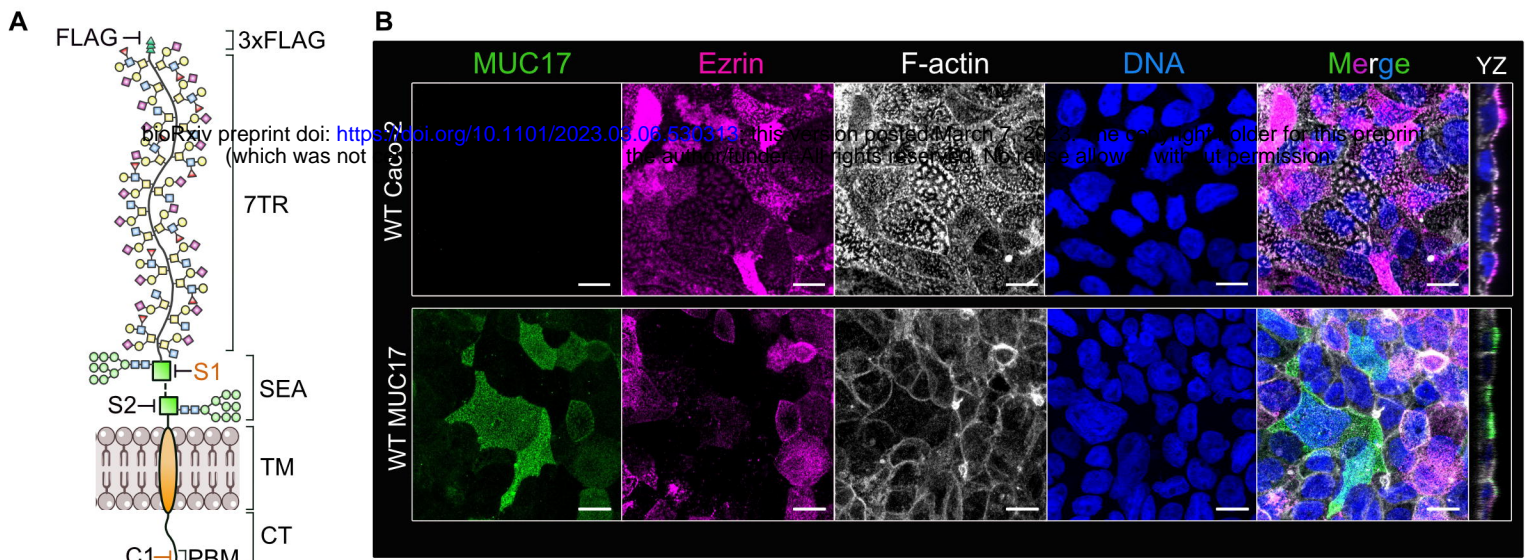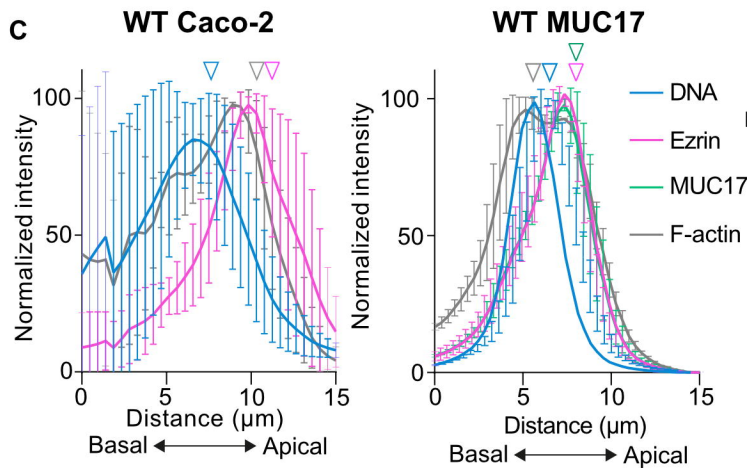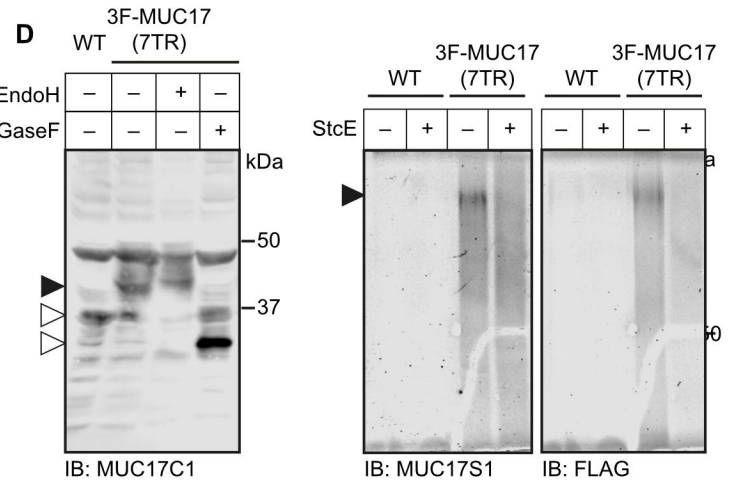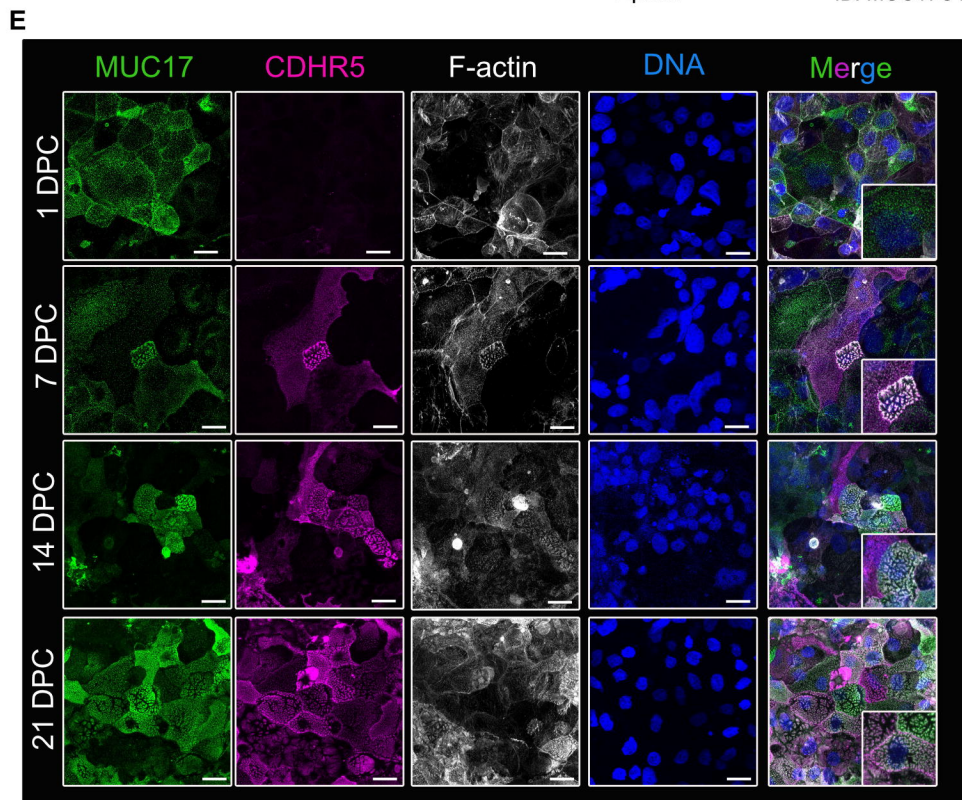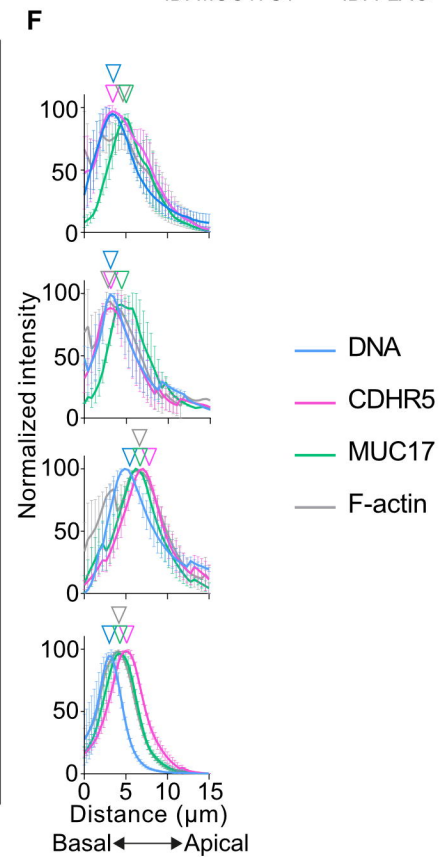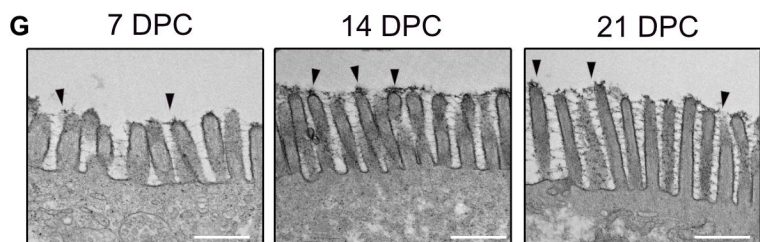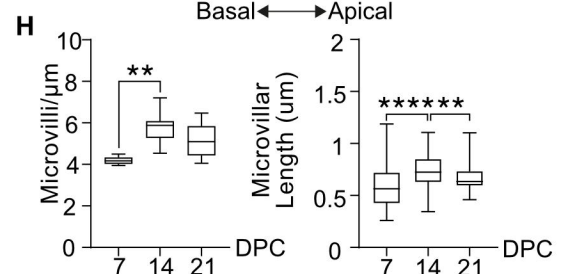

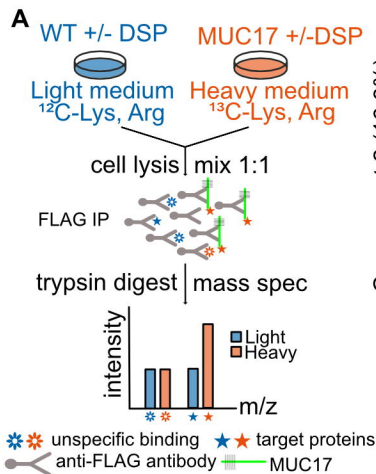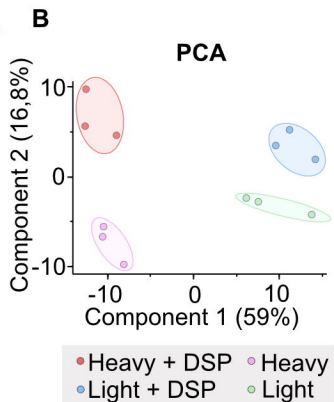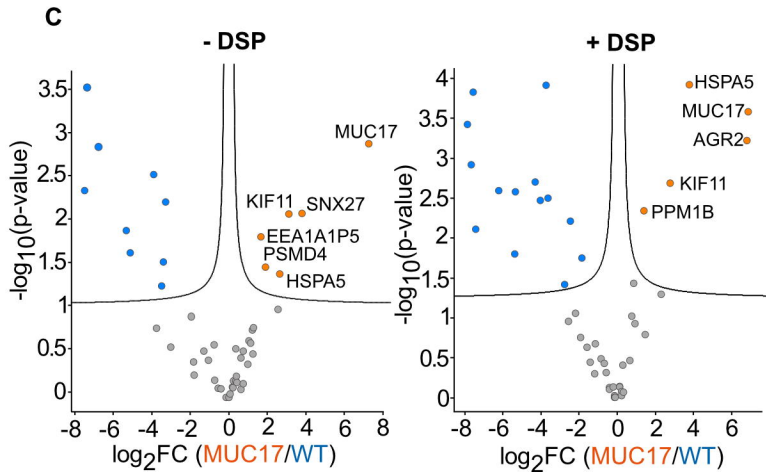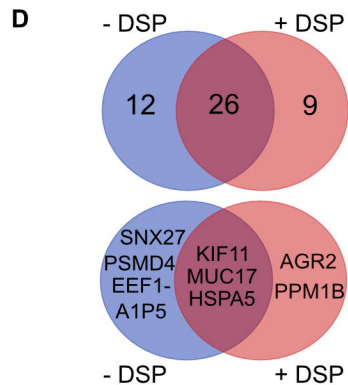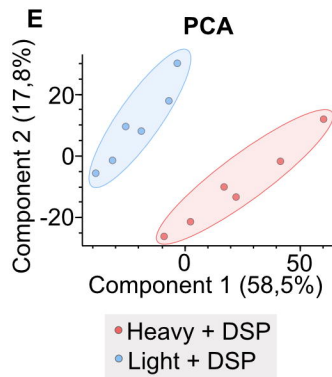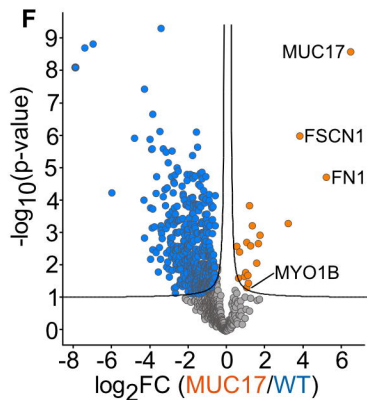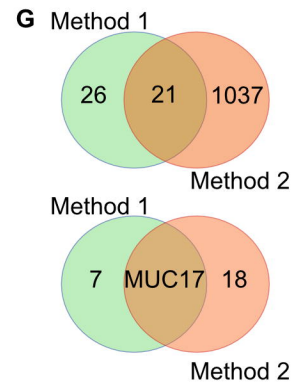

**A**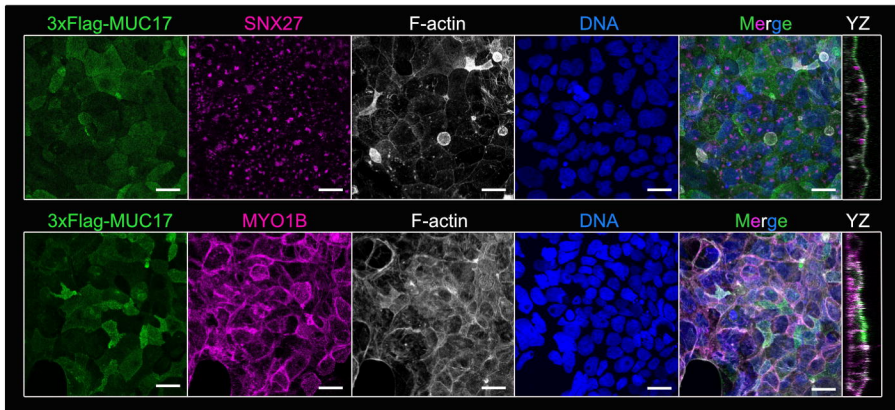**B**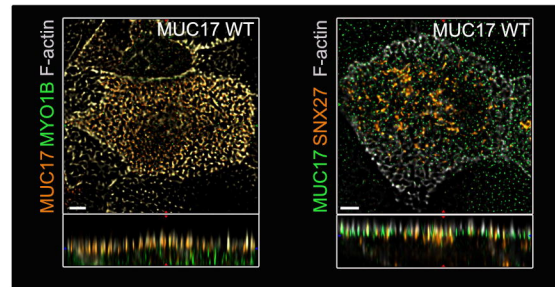**C**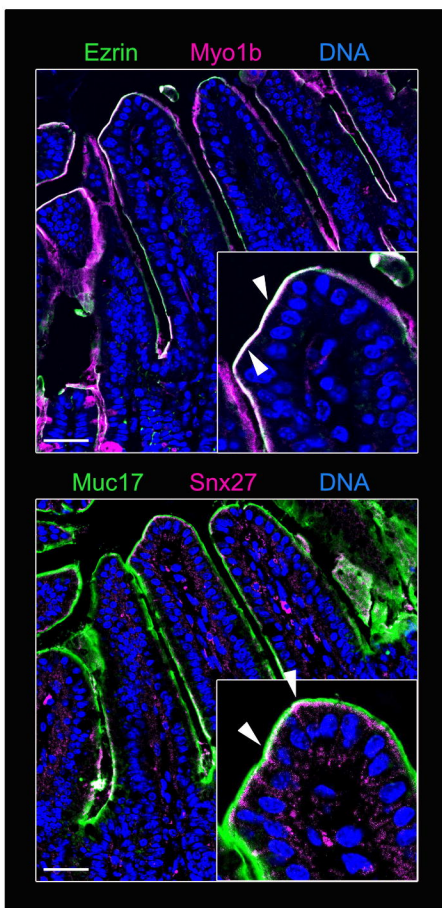**D**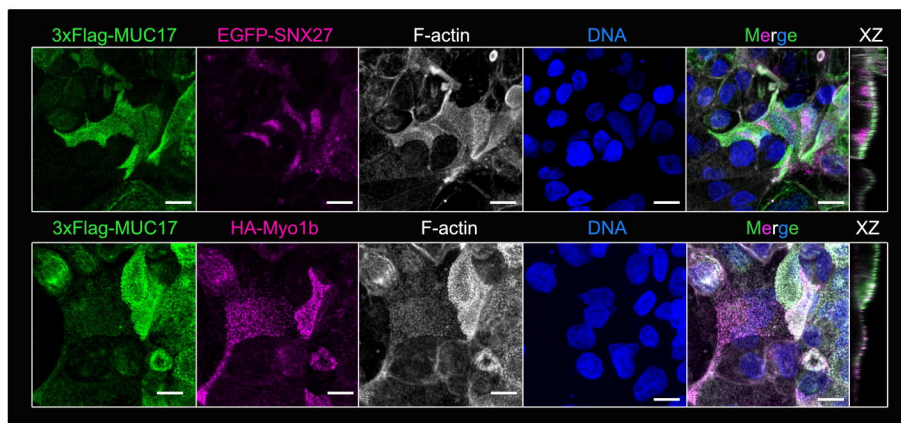**E**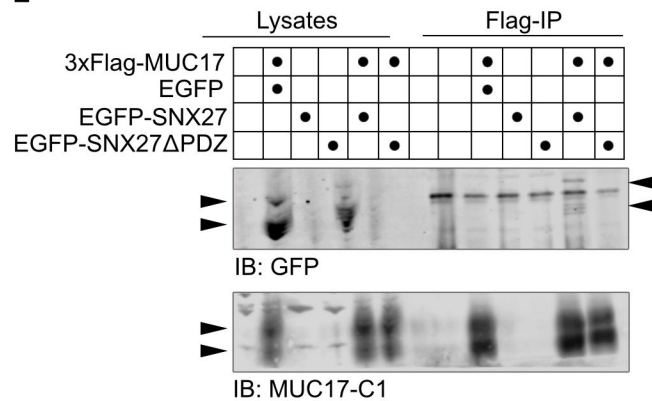



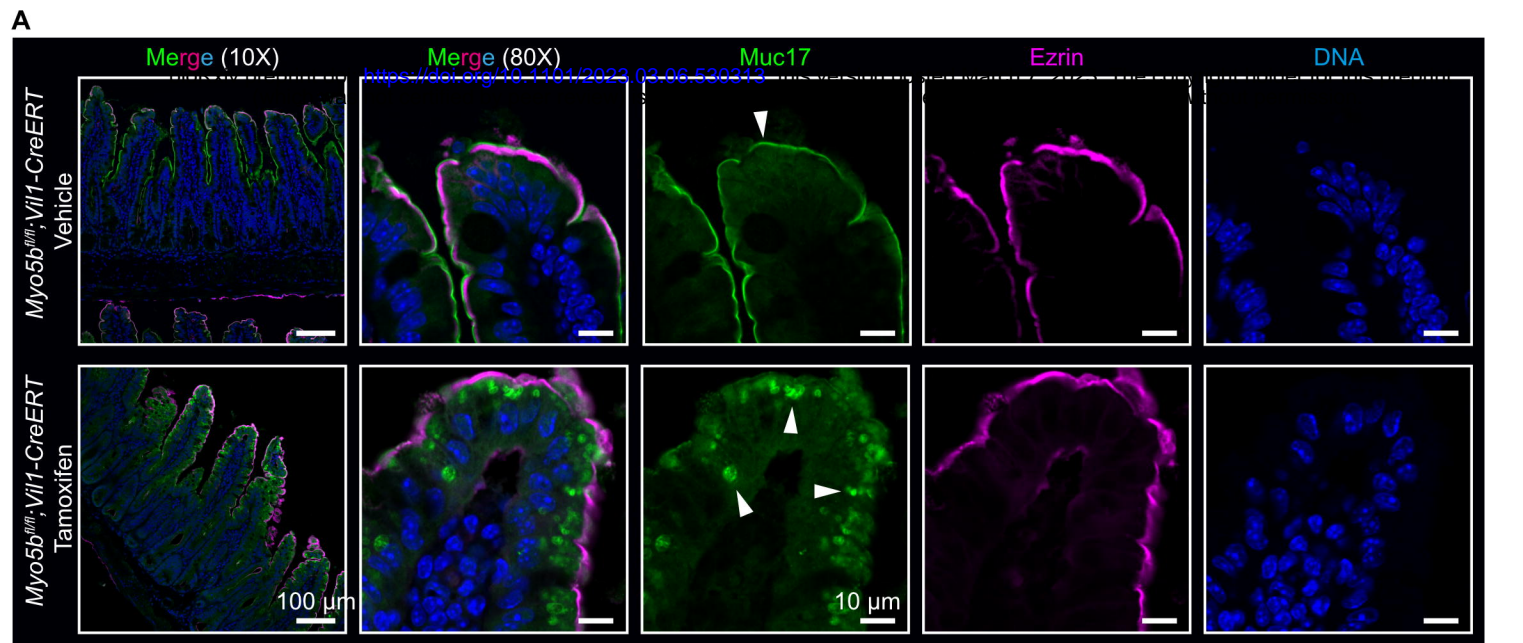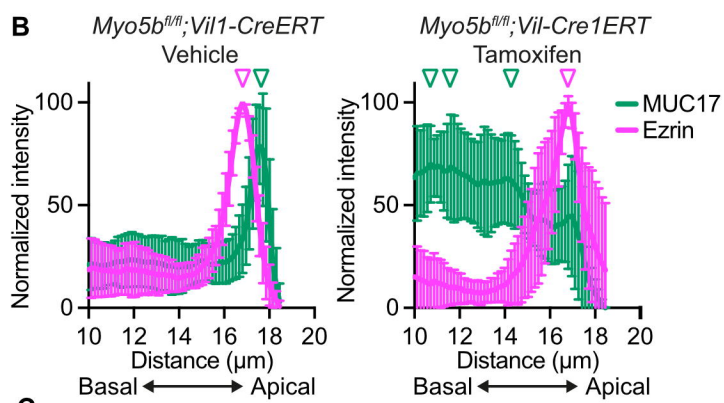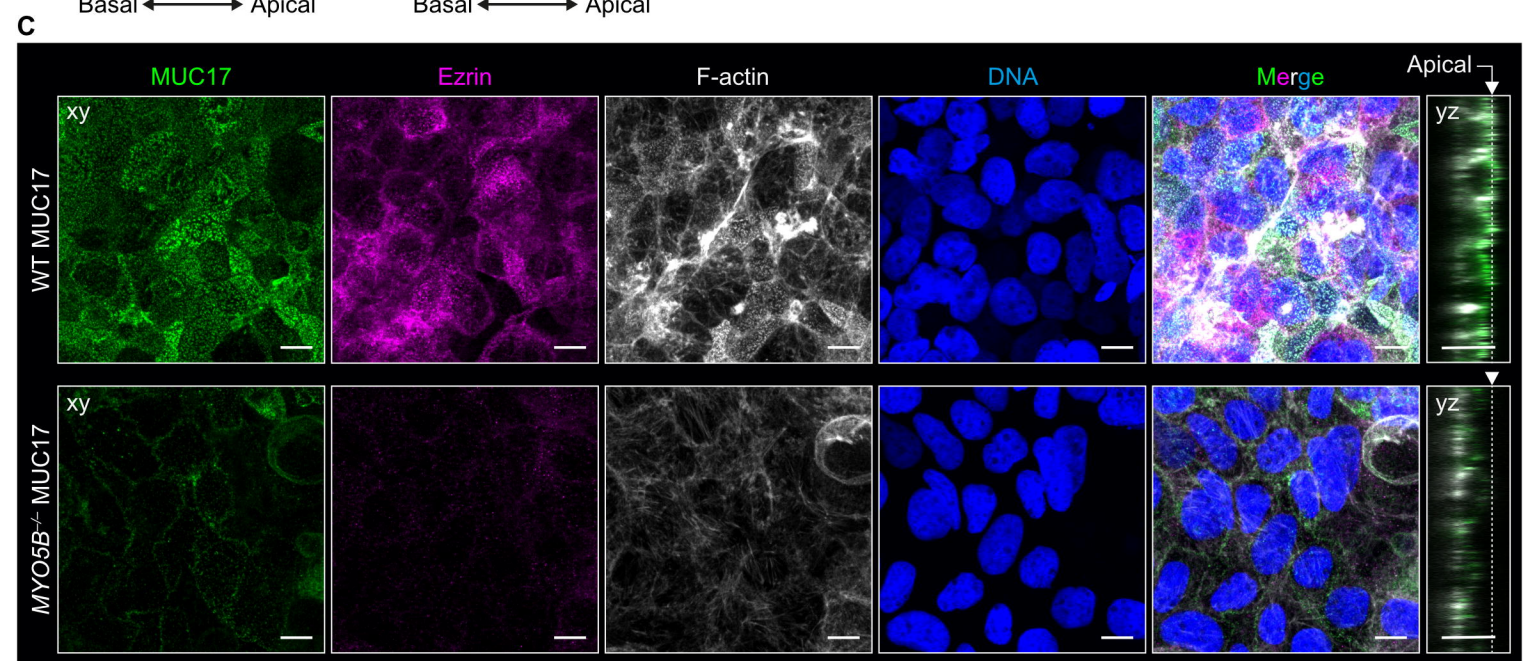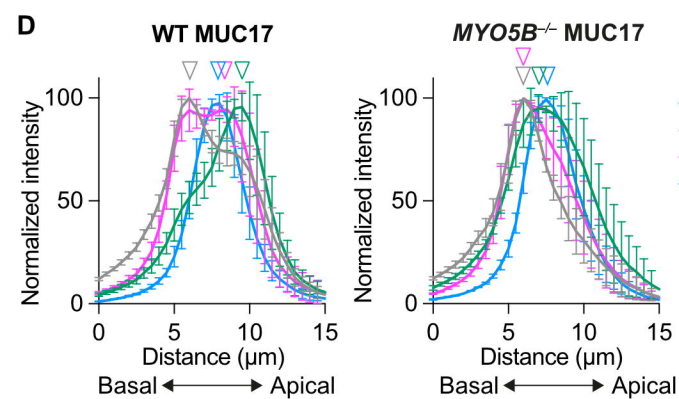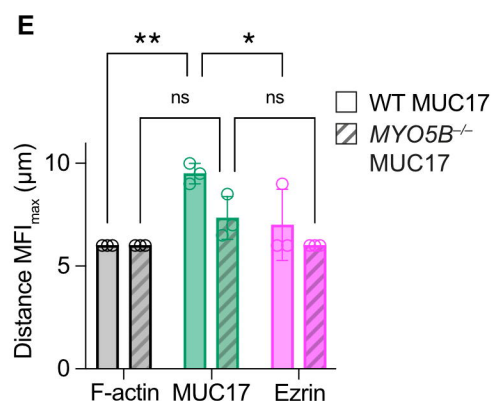

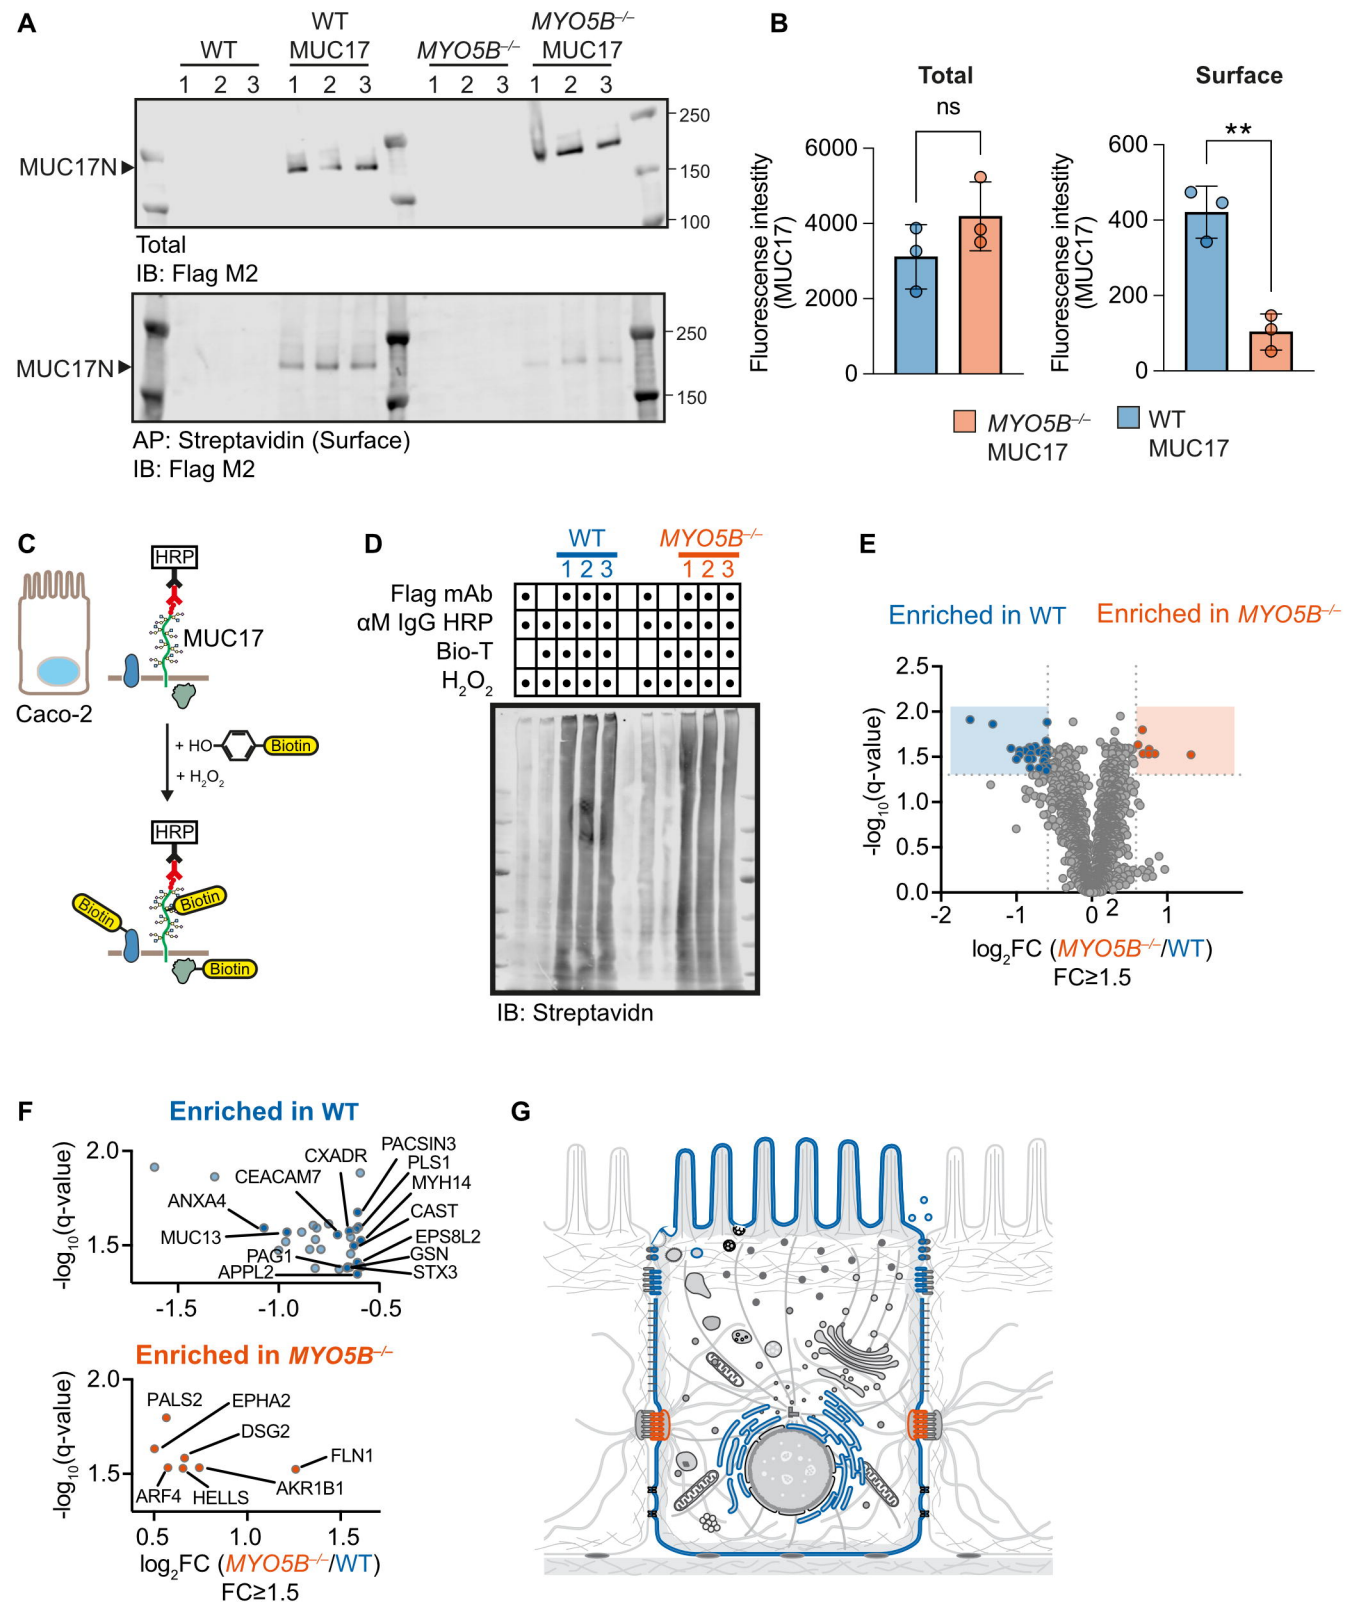

**A**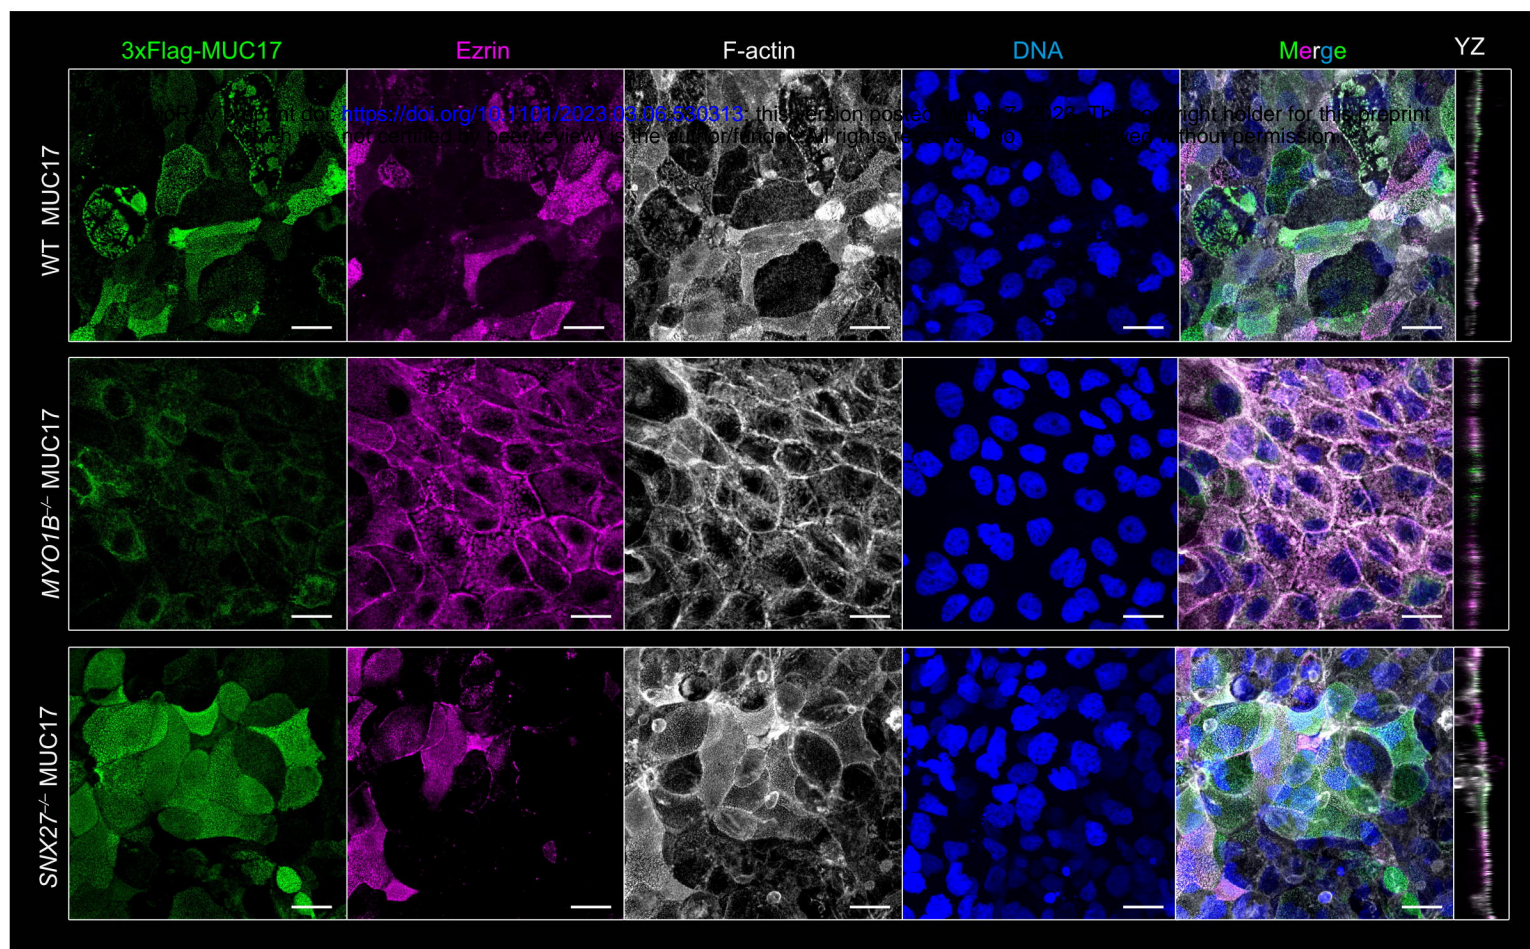**B**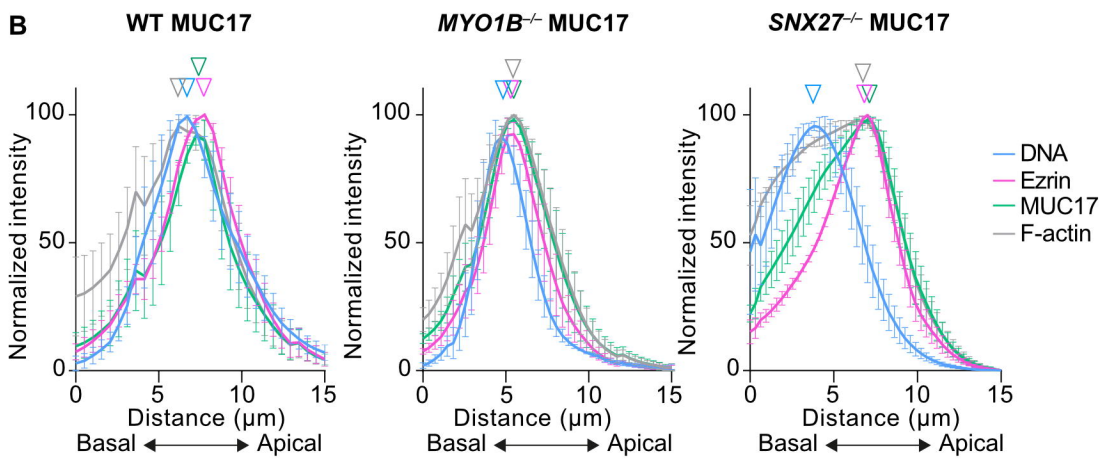**C**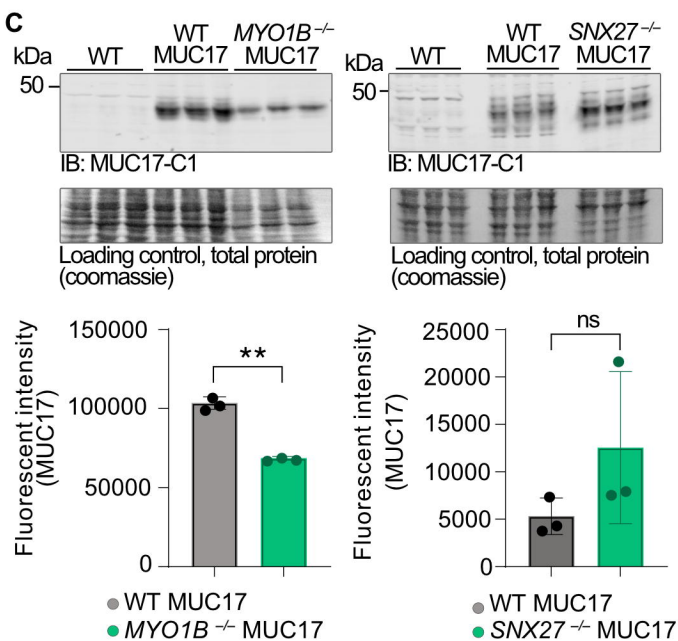**D**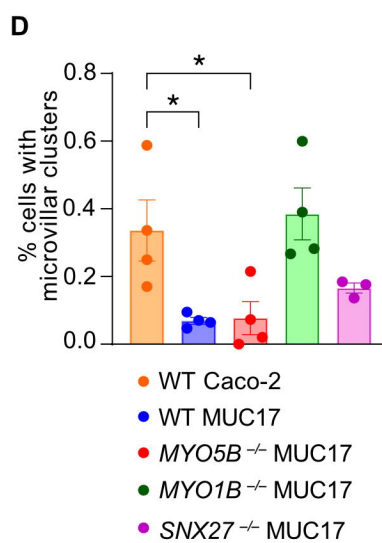**E**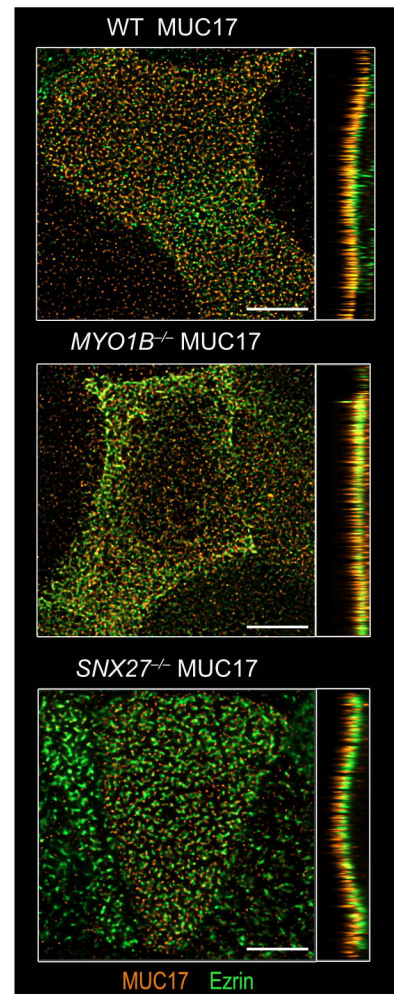

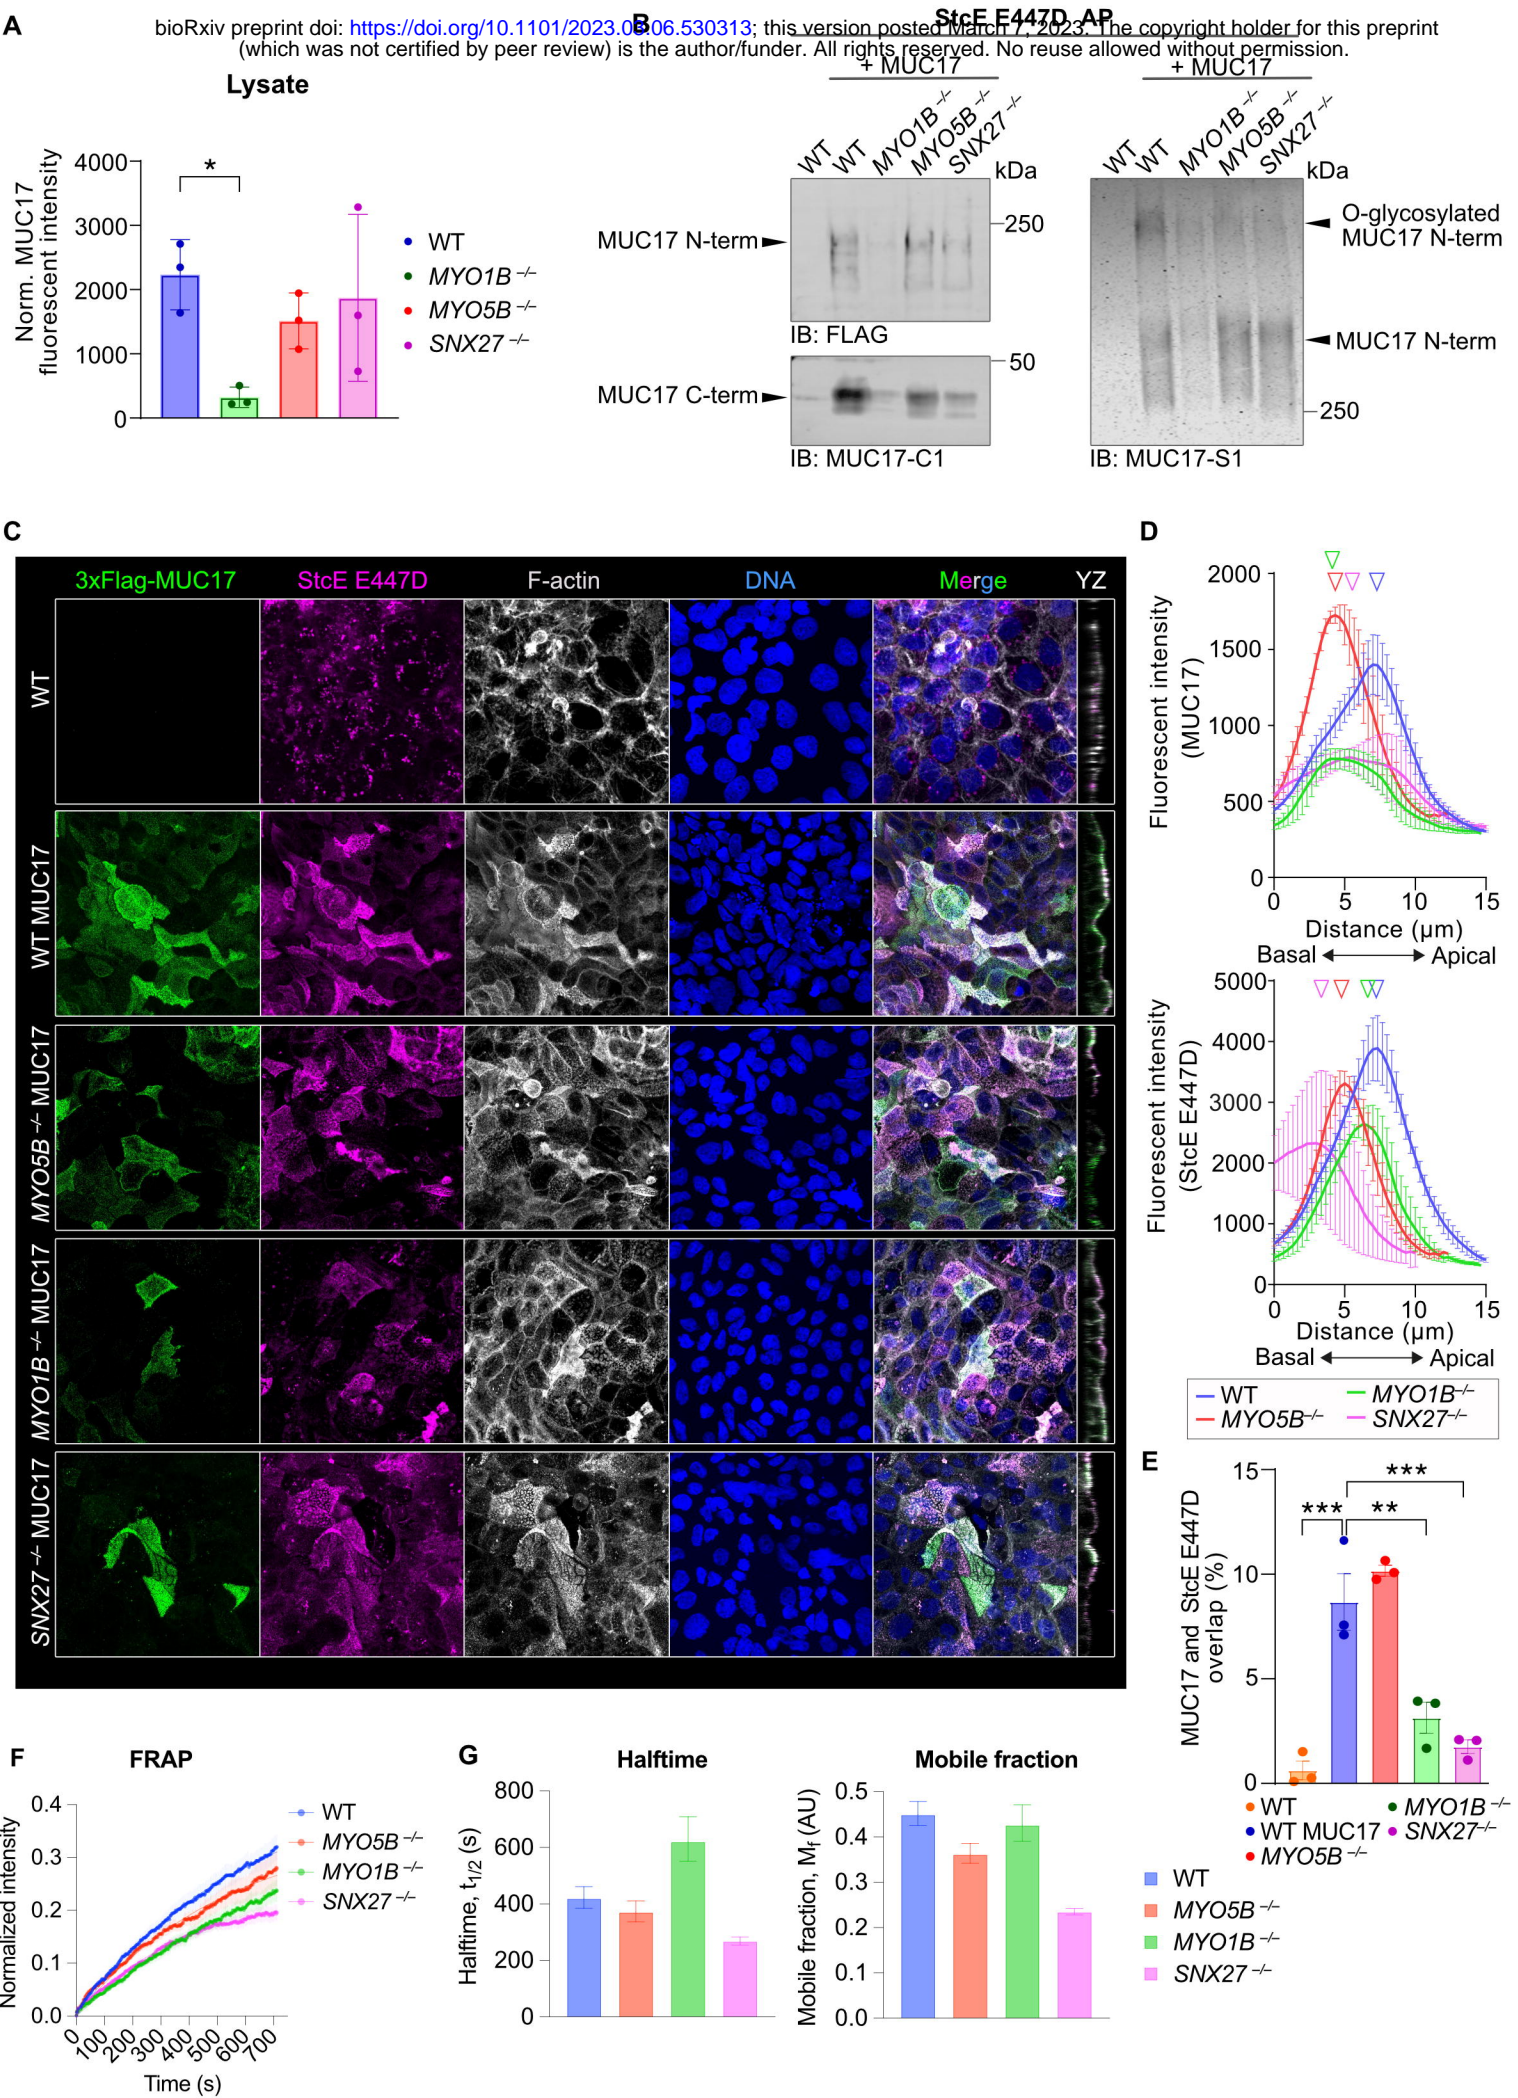

Source: https://www.biorxiv.org/content/10.1101/2023.03.06.530313v1.full.pdf
